1 **Full title:**

2 **Highly efficient scarless knock-in of reporter genes into human and mouse pluripotent stem**  
3 **cells via transient antibiotic selection**

4

5 **Short title:**

6 **Efficient stem cell knock-in via transient selection**

7

8 **Authors:** Valentin M. Sluch<sup>1,#</sup>, Xitiz Chamling<sup>2,#</sup>, Claire Wenger<sup>3</sup>, Yukan Duan<sup>2</sup>, Dennis S.

9 Rice<sup>1</sup>, Donald J. Zack<sup>2,3,4,\*</sup>

10 # = these authors contributed equally to this work

11 1. Department of Ophthalmology, Novartis Institutes for BioMedical Research, Cambridge,  
12 Massachusetts, USA

13 2. Department of Ophthalmology, Wilmer Eye Institute, Johns Hopkins University School of  
14 Medicine, Baltimore, Maryland, USA

15 3. McKusick-Nathans Institute of Genetic Medicine, Johns Hopkins University School of  
16 Medicine Baltimore, Maryland, USA

17 4. Department of Molecular Biology and Genetics, The Solomon H. Snyder Department of  
18 Neuroscience, Institute of Genetic Medicine, Johns Hopkins University School of Medicine,  
19 Baltimore, Maryland, USA

20

21 **\*Author for correspondence:**

22 Donald J. Zack  
23 [dzack@jhmi.edu](mailto:dzack@jhmi.edu)

24

25 **Author contributions:**

26 V.M.S., X.C., and D.J.Z. conceived the study. V.M.S. and X.C. contributed to reagent  
27 generation, data acquisition and interpretation, and manuscript preparation. C.W. generated the  
28 EP1 hiPSC RGC reporter line. Y.D. contributed to reagent generation. V.M.S. wrote the  
29 manuscript with contributions from all other authors.

30

31 **Keywords:** CRISPR-Cas9, pluripotent stem cells, homology directed repair, knock-in,  
32 puromycin selection

33

34 **Abstract:**

35 Pluripotent stem cells (PSCs) edited with genetic reporters are useful tools for  
36 differentiation analysis and for isolation of specific cell populations for study. Reporter  
37 integration into the genome is now commonly achieved by targeted DNA nuclease-enhanced  
38 homology directed repair (HDR). However, human PSCs are known to have a low frequency of  
39 gene knock-in (KI) by HDR, making reporter line generation an arduous process. Here, we  
40 report a methodology for scarless KI of large fluorescent reporter genes into PSCs by transient  
41 selection with puromycin or zeocin. With this method, we can perform targeted KI of a single  
42 reporter gene with up to 65% efficiency, as well as simultaneous KI of two reporter genes into  
43 different loci with up to 11% efficiency. Additionally, we demonstrate that this method also  
44 works in mouse PSCs.

45

46

47

48 **Introduction:**

49 Pluripotent stem cells (PSCs) represent a powerful tool for disease modeling as well as *ex*  
50 *vivo* developmental and mechanistic studies, and they are also currently being used in clinical  
51 trials for regenerative medicine(1-7). Due to advances in genome editing technologies, such as  
52 zinc finger nucleases, transcription activator-like effector nucleases, and clustered regularly  
53 interspaced short palindromic repeats with the associated Cas9 protein (CRISPR-Cas9)(8), it has  
54 become possible to routinely perform genome editing in PSCs. Targeted mutations for disease  
55 modeling(9) or knock-in reporter genes(10-12) to aide in high throughput screening(13) or to  
56 mark cells for isolation have been introduced into PSCs via genome editing. Nevertheless,  
57 genome editing of human PSCs, including both induced pluripotent stem cells (hiPSCs) and  
58 embryonic stem cells (hESCs), remains challenging due to the low efficiency of homology  
59 directed repair (HDR)-based knock-in (KI) in PSCs, with frequencies reported to be generally  
60 around 1%(14, 15). A number of groups have attempted to overcome this low efficiency by  
61 enriching for transfected stem cells via fluorescence activated cell sorting (FACS)(16, 17),  
62 enhancing HDR frequencies via small molecule treatment(18) or synchronizing the cell cycle  
63 (19), or utilizing non-homologous end joining (NHEJ) pathways for KI(20). These efforts have  
64 indeed helped to improve the efficiency of single base pair edits. For example, by using FACS-  
65 based enrichment of transfected cells, or permanent integration of Cas9 into the genome, single  
66 base pair edits have been reported with 11% and 34% efficiency, respectively(16, 21). However,  
67 FACS instruments for live-cell sorting are not available to every lab, and the genomic integration  
68 of Cas9 into cells may have long-term detrimental effects due to potential Cas9 toxicity(22) and  
69 the risk of non-specific DNA cleavage(23). Moreover, efficient, targeted KI of larger DNA  
70 elements, such as fluorescent reporter genes, has not been demonstrated in these studies(16, 21).

71 The co-introduction of a gene conferring antibiotic resistance with the target KI gene  
72 allows for selection of the KI event, and has been suggested to be a more efficacious strategy to  
73 facilitate integration of the target into the genome(24, 25). This strategy can be highly efficient,  
74 with reported KI frequencies of 1.5 to 94%, although with significant variability across cell lines  
75 and target loci. Despite the increased KI efficiency associated with this method, a potential  
76 concern is that the integrated antibiotic resistance gene remains as a permanent genetic “scar”  
77 that may unintentionally affect nearby gene expression(26). Although it is sometimes possible to  
78 remove this additional exogenous DNA, e.g. using Cre-lox or FLP-FRT recombinase  
79 technologies(24) or transposases(27), this treatment prolongs the required experimental time and  
80 effort, and adds additional DNA manipulation into the experimental workflow. Here, we report  
81 an improved method for “scarless” KI of large constructs, such as fluorescent reporters, by  
82 simply enriching for cells transfected with the Cas9-P2A-Puro plasmid via transient puromycin  
83 selection. We show that a transient, 24-hour antibiotic selection dramatically increases the KI  
84 frequency of large inserts, such as eGFP, by over 33-fold and with an efficiency approaching  
85 ~65%. We validate the efficacy of this method across multiple targets, inserts, and stem cell  
86 lines, and show that simultaneous KI of two reporter genes is also achievable. Furthermore, this  
87 method improves KI efficiency in mouse embryonic stem cells (mESCs), up to ~60%, and it is  
88 not limited to the use of puromycin, as use of zeocin yields a similarly high efficacy.

89

## 90 **Results:**

### 91 **Transient puromycin selection facilitates efficient KI of eGFP into hESCs**

92 PSCs are traditionally transfected using electroporation-related methodologies. In an effort to  
93 develop a simpler, more cost-effective, and higher throughput method, we utilized DNA-In

94 Stem, a lipofection reagent (GST-2130, MTI-GlobalStem, Thermo Fisher Scientific). With  
95 DNA-In Stem, we achieved 25-30% transfection of large plasmids such as lenti-CMV-eGFP (9  
96 kb) and Cas9-P2A-mKate2 (Fig 1). In order to further enrich for Cas9-transfected cells and to  
97 improve our chances of isolating HDR-corrected clones, we transfected H9 hESCs with a Cas9-  
98 P2A-Puro+U6-gRNA plasmid and selected the cells with puromycin after transfection. We  
99 established 0.6  $\mu\text{g}/\text{mL}$  as an optimal dose of puromycin for H9 hESCs to ensure that all  
100 untransfected cells were dead after a 24-hour treatment. To test if puromycin-based selection of  
101 the Cas9-transfected hESCs improves the KI efficiency of large DNA sequences, we performed a  
102 targeted KI of an *H2B-eGFP* sequence into the C-terminal end of the housekeeping gene  
103 encoding TATA-box binding protein (*TBP*) (Fig 2A). In this setup, the cells that undergo HDR-  
104 based KI of *H2B-eGFP* express a nuclear localized eGFP (Fig 2B). Forty hours after  
105 transfection, cells were treated with puromycin for 24 hours and then allowed to recover and  
106 expand for 5-7 days. Successful KI was then assessed using fluorescent microscopy and  
107 quantified using flow cytometry analysis. With puromycin selection, we achieved a remarkably  
108 high KI frequency of  $\sim 46.6\%$  compared to  $\sim 1.4\%$  without selection (Fig 2C, D). For simplicity,  
109 we refer to all subsequent KI sequences by their fluorescent gene name only, and their additional  
110 cell localization details can be found in the methods section.

111

### 112 **Fig 1. Transfection efficiency of H9 hESCs using lipofection.**

113 (A) Phase/brightfield and fluorescence microscopy images of eGFP or Cas9-mKate2 plasmid  
114 transfected H9 hESCs are shown. Scale bar = 100  $\mu\text{m}$ . (B) Flow cytometry assessment of H9  
115 hESCs transfection. Untransfected cells were used to set the negative gates. BSC-A = back  
116 scatter area. Cells were analyzed at 40 hours post transfection in both A and B.

117

118 **Fig 2. Transient puromycin selection increases reporter KI efficiency.**

119 (A) Schematic of gene reporter design created by CRISPR editing. (B) Phase and fluorescence  
120 microscopy images of *TBP-P2A-eGFP* KI into H9 hESCs after puromycin selection. Scale bar =  
121 100  $\mu$ m. (C) Representative images of flow cytometry assessment of *TBP-P2A-eGFP* KI into H9  
122 hESCs with and without transient puromycin selection. Untransfected cells were used to set the  
123 gates for reporter negative cells. Two peaks of eGFP<sup>+</sup> cells can be observed in the puromycin  
124 treated group suggesting homozygous and heterozygous KI. (D) Flow cytometry analysis of  
125 *TBP-P2A-eGFP*, *MYC-P2A-eGFP*, and *SOX2-P2A-eGFP* KI into H9 hESCs with and without  
126 transient puromycin selection. For *TBP* n = 2 for both groups, for *MYC* n = 2 for replicates  
127 without puromycin and n = 5 for replicates with puromycin treatment, for *SOX2* n = 3 for  
128 replicates without puromycin and n = 4 for replicates with puromycin treatment. n = biological  
129 replicates. *p* values: *TBP* = 0.0047, *MYC* = 0.0041, *SOX2* = 0.0057. \*\* =  $p < .01$ . Unpaired two  
130 tailed t-test was used.

131

132 **Transient puromycin selection increases KI efficiency with multiple genes and cell lines**

133 To test the generality of the increased HDR efficiency that we noted with *TBP* in H9  
134 hESCs, we tested additional P2A-eGFP KI gene reporters (*MYC* proto-oncogene, bHLH  
135 transcription factor (*MYC*) and SRY-box 2 (*SOX2*)). Although the efficiency of KI for these  
136 genes was lower than *TBP* in H9 hESCs, puromycin treatment successfully increased the KI  
137 frequency from 2.3% to 11.4% and from 2.5% to 22.0% for *MYC* and *SOX2*, respectively (Fig  
138 2D). We also confirmed that transient puromycin selection increases KI efficiency in other hESC  
139 and hiPSC lines: H7, IMR90-4 and EP1(28, 29). Although some expected variability in KI

140 efficiency for the different lines was noted, transient puromycin selection yielded a 5 to 24-fold  
141 increase in KI frequencies for all hESC and hiPSC lines tested (Fig 3). Then to test KI for a gene  
142 that is not expressed in undifferentiated stem cells, since chromatin state associated with  
143 transcriptional activity could potentially affect HDR efficiency, we transfected EP1 hiPSCs with  
144 the *BRN3B (POU4F2)-P2A-tdTomato-P2A-Thy1.2* construct that we previously used to make  
145 retinal ganglion cell (RGC) reporter lines in H7 and H9 hESCs(11). Following transfection and  
146 transient puromycin selection, we plated the surviving cells as single cells at a low density for  
147 clonal derivation. PCR-based genotyping of 65 individual clones showed a markedly increased  
148 KI efficiency of 64.6% (Fig 4), compared to our initial frequency of 1.4% using traditional  
149 methodology with this same reporter construct(11). Karyotyping and PCR-based off-target  
150 analysis of the EP1-derived *BRN3B* reporter line showed that the puromycin treatment did not  
151 cause chromosomal abnormalities or off-target editing (S1 Fig)(12). Additionally, we  
152 differentiated the EP1 reporter line to RGCs per our prior protocol(11), and observed no  
153 differences in our ability to derive RGCs from this reporter line generated using transient  
154 puromycin selection.

155

156 **Fig 3. Demonstration of increased reporter KI efficiency in multiple human PSC lines after**  
157 **transient puromycin treatment.**

158 (A) Representative images of flow cytometry assessment of *SOX2-P2A-eGFP* KI into EP1  
159 hiPSCs with and without transient puromycin selection followed by flow cytometry analysis.  
160 Untransfected cells were used to set the gates for reporter negative cells. n = 2 for both groups.  
161 p value = 0.0039. (B) Flow cytometry analysis of *TBP-P2A-eGFP* KI into EP1 hiPSC, H7 hESC,  
162 and IMR90-4 hiPSC lines, respectively, with and without transient puromycin selection. For EP1

163 and H7, n = 2 for both groups, for IMR90-4 n = 3 for replicates without puromycin and n = 4 for  
164 replicates with puromycin treatment. n = biological replicates. *p* values: EP1 = 0.0246, H7 =  
165 0.1532, IMR90-4 = <0.0001. \* =  $p < .05$ , \*\* =  $p < .01$ , \*\*\*\* =  $p < .0001$ . ns = not significant.  
166 Unpaired two tailed t-test was used.

167

168 **Fig 4. Generation of an RGC reporter line in EP1 hiPSC background using transient**  
169 **puromycin treatment.**

170 (A) PCR zygosity test for KI at the targeted *BRN3B* locus. Primers spanning the integration  
171 region were used to amplify genomic DNA from randomly picked colonies derived from plating  
172 single cells. Homozygous insertion of the KI cassette is indicated by a single band at 3.3 kilobase  
173 pairs (kb). KI negative clones generate a band of 1.3 kb. Clones producing both bands were  
174 scored as heterozygous KI. WT = wildtype. For some of the clones (e.g. lane 6), the KI product  
175 is split into two parts due to an incorporation of only one monomer of the tdTomato sequence.

176 (B) Fluorescence and phase microscopy of a differentiated EP1 hiPSC RGC reporter line  
177 generated using transient puromycin selection. Cells were imaged on day 29 of differentiation.  
178 Scale bar = 1000  $\mu\text{m}$ .

179

180 **S1 Fig. EP1-RGC reporter line off-target mutation and karyotype analysis.**

181 (A) The four most likely *in-silico* predicted off-target mutations for the *BRN3B* gRNA were  
182 sequenced and confirmed to be WT. (B) Karyotyping analysis using KaryoStat™ found no  
183 chromosomal aberrations.

184 **Transient puromycin selection allows for the creation of dual reporter KI lines**



185           Based on the ability of puromycin transient selection to promote generation of single  
186 reporter KI lines, we evaluated its ability to promote simultaneous KI of two reporters in two  
187 different loci. For this experiment, we targeted a KI of *TBP-P2A-eGFP* and *MYC-P2A-tdTomato*  
188 or *TBP-P2A-tdTomato* and *SOX2-P2A-eGFP* into H9 hESCs and analyzed the result by flow  
189 cytometry. With puromycin selection, KI frequencies were ~9.5% and 11.3% for each  
190 combination, respectively (Fig 5). Notably, most of our KI cells were double positive, supporting  
191 the previously reported observation that HDR occurrence at one locus is associated with an  
192 increased frequency of HDR at other loci(30, 31).

193

194 **Fig 5. Dual KI of *TBP* and *MYC* or *TBP* and *SOX2* fluorescent reporters into H9 hESCs.**

195 (A) Representative images of flow cytometry assessment of dual KI of *TBP-P2A-eGFP* and  
196 *MYC-P2A-tdTomato* or *TBP-P2A-tdTomato* and *SOX2-P2A-eGFP* into H9 hESCs with and  
197 without transient puromycin selection. (B) Flow cytometry analysis of the dual KI described in  
198 A. n = 2 for both dual KI combinations. n = biological replicates. (C) Fluorescence and  
199 brightfield microscopy of H9 hESCs positive for both reporter genes. Scale bar = 400  $\mu$ m.

200

201 **Transient puromycin selection improves KI in mESCs**

202           Given that all the above-described experiments were performed with human PSCs, we  
203 wanted to test if transient puromycin selection would also promote HDR in mouse stem cells.  
204 After establishing an appropriate puromycin dose for the commonly used mouse embryonic stem  
205 cell (mESC) line E14TG2a(32), we transfected these cells via lipofection with CRISPR plasmids  
206 and the corresponding donor templates for *AdipoR1-eGFP*, *Mitf-P2A-tagRFP*, and *Six6-P2A-*  
207 *GFP*, targeting the genes for the adiponectin receptor 1, melanogenesis associated transcription

208 factor, and sine oculis-related homeobox 6, respectively. Due to their faster growth rate, we  
209 treated the mESCs with puromycin at 24 hours post transfection rather than the 40 hours that was  
210 used for human PSCs. Following recovery, the surviving populations were plated as single cells  
211 to derive independent colonies and 24 colonies were PCR-screened for KI insertion. We found  
212 KI frequencies of 45.8%, 33.3%, and 58.3% for targeting *AdipoR1*, *Mitf*, and *Six6*, respectively  
213 (Fig 6). To check whether puromycin treatment had abrogated the ability of these cells to  
214 faithfully differentiate, we tested one of the homozygous *Six6-P2A-eGFP* lines in optic cup  
215 retinal differentiation(33). *Six6* is an eye field transcription factor that is highly expressed in the  
216 optic vesicle(34, 35) during retinal development. After 8 days of differentiation, we observed  
217 eGFP positive vesicles emerge from the main aggregate signifying successful retinal  
218 differentiation.

219

220 **Fig 6. Transient puromycin selection results in high KI efficiency of fluorescence reporter**  
221 **genes into mESCs.**

222 (A, B, C) PCR tests for fluorescent reporter KI at the indicated loci in mESCs. For A and B,  
223 primers amplifying a region inside the KI gene and outside the donor plasmid template were  
224 used. For C, primers spanning the integration region were used to distinguish between  
225 homozygous and heterozygous clones. Expected amplicon sizes are shown. WT = wildtype. For  
226 KI assessment in B, lanes 9 and 17 were not counted as positive KI because the amplicon did not  
227 run at the predicted size. (D) Phase and fluorescence microscopy of a homozygous *Six6-P2A-*  
228 *eGFP* reporter KI line generated in C. mESCs were differentiated to optic vesicles for 8 days.  
229 Scale bar = 275  $\mu$ m.

230

231 **Zeocin can replace puromycin for transient selection-based KI**

232 Next, to test if the ability of transient puromycin selection to improve KI efficiency is  
233 simply due to enrichment of transfected cells or through some other activity specific to  
234 puromycin, we tested if treatment with another selective agent would increase KI efficiency to a  
235 comparable extent. We replaced the puromycin resistance sequence in the Cas9 plasmid with one  
236 for zeocin resistance (Cas9-P2A-Zeocin). Zeocin, which has a completely different mechanism  
237 of action (targeting DNA) than puromycin (inhibiting protein translation), also results in rapid  
238 death of untransfected stem cells(36). We repeated the KI experiments using Cas9-P2A-Zeocin  
239 and the *TBP-P2A-eGFP* donor plasmids. Transient 24 hour zeocin selection at 40 hours post  
240 transfection resulted in 13.7% and 9.2% KI efficiency for IMR90-4 hiPSCs and H7 hESCs,  
241 respectively (Fig 7), values that were actually slightly higher than our prior puromycin selection  
242 efforts targeting *TBP* in these cell lines.

243

244 **Fig 7. Zeocin replacement of puromycin results in similar KI efficiency of fluorescent**  
245 **reporter genes into human PSCs.**

246 (A) Representative images of flow cytometry assessment of *TBP-P2A-eGFP* KI into IMR90-4  
247 hiPSCs and H7 hESCs with and without transient zeocin selection. (B) Flow cytometry analysis  
248 of *TBP-P2A-eGFP* KI in part A. For IMR90-4, n = 3 for replicates without zeocin and n = 4 for  
249 replicates with zeocin treatment, for H7 n = 2 for replicates without zeocin and n = 5 for  
250 replicates with zeocin treatment. n = biological replicates. *p* values: IMR90-4 = 0.0172, H7 =  
251 0.0036; \* =  $p < .05$ , \*\* =  $p < .01$ ; Unpaired two tailed t-test was used.

252

253 **Discussion:**

254 Genome editing of pluripotent stem cells (PSCs) greatly enhances the utility of PSCs for  
255 studying biological processes, use in disease modeling(9), and reporter line generation for  
256 specific cell type isolation(11, 12). Here, we have demonstrated that transient selection with  
257 puromycin or zeocin can facilitate highly efficient scarless KI of relatively large reporter genes  
258 (over 2 kb in the case of *BRN3B-P2A-tdTomato-P2A-Thy1.2*) into both human and mouse PSCs.  
259 These KI cell lines differentiated normally, and did not show karyotypic abnormalities or display  
260 off-target effects. Moreover, since the antibiotic resistance gene is not integrated into the  
261 genome, these reporter-positive clones could be directly expanded for use in experiments without  
262 the need to undergo further manipulation to excise the resistance cassette.

263 We have successfully applied the transient selection method in four human PSC lines for  
264 KI at four different loci as well as one mESC line with KI at three other loci. Our observed KI  
265 efficiencies varied from 6.6 to 64.6% in human PSCs and from 33.3 to 58.3% in mESCs,  
266 presumably reflecting the high degree of gene editing variability that has also been observed by  
267 others (24, 25). Although mouse stem cells generally demonstrate higher KI frequencies than  
268 their human counterparts (e.g. a previous study had reported a KI efficiency of 15% for insertion  
269 of eGFP(37)), the KI frequencies we observed in mESCs were even higher than the ones  
270 achieved via small molecules(18) or positive KI selection(31). With the high KI efficiencies  
271 described in this manuscript, with both human and mouse PSCs, it becomes reasonable to isolate  
272 reporter-positive lines from as few as approximately twenty clones versus the standard practice  
273 of picking hundreds of clones. Moreover, we were able to generate dual KI reporter cell lines at  
274 ~10% efficiency. A dual KI reporter could be advantageous to mark different cell subtypes(11),  
275 label differentiation progression(38), or to increase stringency of selection in situations where a  
276 single gene signature is not enough to define a specific cell population. Importantly, based on our

277 data and the previous report that successful HDR at one locus is associated with increased  
278 frequency of HDR at additional loci(30, 31), it should be possible to multi-plex reporter KIs to  
279 more than two loci. Additionally, with a high KI efficiency it may be advantageous to knock-out  
280 genes by knocking-in stop codon sequences at precise locations instead of relying on NHEJ to  
281 generate loss of function alleles by random mutagenesis.

282         Recently, Steyer and Bu et al.(39) reported that transient puromycin selection for 3  
283 consecutive days increased the efficiency of single base pair KI in human PSCs to values  
284 between 14 to 44%. Notably, as KI efficiency tends to decrease with increasing insert size(40),  
285 their reported KI frequency for a 21 base pair insert was a little lower at 36%, and they did not  
286 demonstrate that their method could be used to KI larger constructs. In their method, human  
287 PSCs are electroporated and puromycin is added for 3 days starting at 24 hours post transfection  
288 along with a Rho kinase (ROCK) inhibitor. Our methodology utilizes lipofection and  
289 puromycin/zeocin that was added at ~40 hours post transfection and for only 24 hours. Although  
290 both our data and their work(39) suggest that puromycin treatment does not alter the karyotype  
291 of PSCs, or increase off-target effects, decreasing the exposure of the cells to puromycin is likely  
292 to reduce the possibility of undesired side-effects, as prolonged antibiotic exposure could  
293 increase the risk of random integration of the resistance gene into the genome.

294         We wondered if the observed KI efficiency was increased due to a more robust selection  
295 pressure that was enriching for the highest Cas9-P2A-Puro expressing cells or whether  
296 puromycin itself had an effect on HDR. To explore this hypothesis we tested whether zeocin, an  
297 antibiotic with a different mechanism of action from puromycin, would yield a comparable high  
298 KI frequency to that which we had observed with puromycin, and found that it did. This result  
299 argues for selection pressure being the main driver of improved KI efficiency. Similarly, Steyer

300 and Bu et al. have reported that utilizing FACS to enrich for the highest Cas9-2A-eGFP-  
301 expressing cells could increase KI frequencies to levels comparable to those achieved by  
302 transient puromycin selection, further supporting the selection pressure hypothesis.

303 In addition to our work and Steyer and Bu et al., other methods have also been recently  
304 introduced to increase KI efficiency in PSCs. Guo et al.(41) have reported that a cold-shock of  
305 hiPSCs achieved by decreasing the culture temperature to 32 °C for 24–48 hours following  
306 transfection increased KI of small base pair inserts to 20–40%. However, this cold-shock  
307 appeared to have a negative effect on NANOG expression, a potential sign of decreased  
308 pluripotency. Notably, Zhang and Li et al.(42) introduced a method that could improve KI  
309 efficiency for large constructs to 15-30% in hiPSCs. However, to generate this effect their  
310 experimental workflow requires cell cycle synchronization via a co-transfection with a *CCND1*  
311 plasmid and Nocodazole treatment in combination with a pre-designed donor vector containing  
312 gRNA sites that enable donor template linearization inside the cell. Importantly, the effects of  
313 these treatments on the karyotype, off-target mutations, and downstream differentiation were not  
314 addressed in either study. It is possible that the combinatorial effect of cold-shocking or cell  
315 cycle synchronization would also translate to an improved KI efficiency when combined with  
316 our transient antibiotic selection. However, in comparison to these previous reports, the method  
317 described here is already highly efficient, technically simpler, requires less manipulation, and  
318 can be adapted by any lab with a basic cell culture facility.

319

## 320 **Methods:**

### 321 **Plasmid design**

322 We used the following gRNAs for targeting their respective loci (5'-3', PAM sequence in bold)

323 *BRN3B* – GCCAAGAGTCTTCTAAATGC **CGG**

324 *TBP* – GATTCAGGAAGACGACGTAA **TGG**

325 *MYC* – AACACAAACTTGAACAGCTA **CGG**

326 *SOX2* – GGCCCTCACATGTGTGAGAG **GGG**

327 *AdipoR1* - GGCTCAGAGAAGGGAGTCGT **CGG**

328 *Mitf* - GAGCTTCAAAAACAAGCAGC **CGG**

329 *Six6* - GATGTCGCACTCACTGTCGC **TGG**

330 The gRNA sequences were based on our prior publications(11, 12) or designed using  
331 CRISPRdirect(43) (<https://crispr.dbcls.jp>) and cloned into an all-in-one (CMV-Cas9 + U6-  
332 gRNA) Cas9-P2A-Puro or Cas9-P2A-Zeo plasmid (modified from Addgene #62988 plasmid to  
333 replace T2A with a P2A sequence).

334 New donor plasmids were generated via PCR amplification of human or mouse genomic DNA of  
335 approximately 1000 base pairs on each side of the gRNA target site. This homology template  
336 was then cloned into Zero Blunt vectors by TOPO cloning (Thermo Fisher Scientific,  
337 <https://www.thermofisher.com>). The reporter gene was then introduced into these donor vectors  
338 using Gibson assembly (NEB, <https://www.neb.com>). By design all gRNA binding genomic  
339 sequences are destroyed by integration of the reporter into the genome to prevent further  
340 CRISPR cutting.

341 The following donor vectors were used in this study:

342 BRN3B-P2A-tdTomato-P2A-Thy1.2

343 MYC-P2A-tdTomato

344 MYC-P2A-myr-eGFP (myr is a myristoylation sequence for membrane localization)

345 SOX2-P2A-eGFP-nls (nls is a nuclear localization signal from SV40)

346 TBP-P2A-H2B-eGFP (H2B is a nuclear localization signal from Histone H2B)

347 TBP-P2A-tdTomato

348 AdipoR1 fusion – eGFP (a truncated P2A was used as a fusion linker)

349 Mitf-P2A-tagRFP

350 Six6-P2A-eGFP-nls

351

### 352 **PCR KI Screening**

353 After genome editing and puromycin selection, stem cells were expanded and passaged as single

354 cells. Formed colonies were individually picked and screened for reporter integration by PCR

355 using the following forward and reverse primers (5'-3'):

356

357 *BRN3B*

358 Primers amplify a region of human genomic DNA spanning the KI integration site. WT DNA

359 produces a 1.3 kb region and KI reporter DNA produces a 3.3 kb region.

360 forward: GGAGAAGCTGGACCTGAAGAAAACGTG

361 reverse: CCTTGGTGAAATCTAAAATCTGAAGGG

362

363 *AdipoR1*

364 Primers amplify a 1.2 kb region of mouse genomic DNA outside the homology plasmid and a

365 region of fusion-tag+eGFP

366 forward: CTTTCTATGATCTTAATGGGAATCTACTCTTCTGGCTTTG

367 reverse: TCGCCCTTGCTCACCATAGGGCCGGGGTTCTCCTCCACGTCG

368



369 *Mitf*

370 Primers amplify a 2 kb region of mouse genomic DNA outside the homology plasmid and a

371 region of tagRFP

372 forward: GACCCTGAATACAGCTCTTTTGTGTAGGCATCTC

373 reverse: CAGGCTCGCTATCAATTAAGTTTGTGCCCCAGTTTGCTAGGGAGG

374

375 *Six6*

376 Primers amplify a region of mouse genomic DNA spanning the KI integration site. WT DNA

377 produces a 2.3 kb region and KI reporter DNA produces a 3.1 kb region.

378 forward: CGGGAGGAGGCATTCTTGGCCCTTA

379 reverse: GCCTGCATACTGTCTCCTATCTTAGTATTTCTCCTGGTG

380

### 381 **Cell culture**

382 Human PSCs (EP1(28, 29) or H7, H9, IMR90-4, WiCell, <https://www.wicell.org>) were

383 maintained by clonal propagation in mTeSR1 media (Stemcell Technologies,

384 <https://www.stemcell.com>) on growth factor-reduced Matrigel coated plates (354230, Corning,

385 <https://ecatalog.corning.com>) at 10% CO<sub>2</sub>/5% O<sub>2</sub>. Cells were passaged by dissociation with

386 Accutase (A6964, Sigma-Aldrich, <https://www.sigmaaldrich.com>) or TrypLE Express

387 (12605010, Thermo Fisher Scientific). mTeSR1 media containing 5 mM blebbistatin (Sigma-

388 Aldrich) was used for maintenance of single cells.

389

390 Mouse ESCs (ES-E14TG2a, ATCC CRL-1821, <https://www.atcc.org>) were maintained on

391 Matrigel coated plates in 2i media - [50:50 mix of Neurobasal (21103049, Thermo Fisher

392 Scientific):DMEM/F12 (10565042, Thermo Fisher Scientific) with 0.5% N2 (17502001, Thermo  
393 Fisher Scientific), 1% B27 (17504044, Thermo Fisher Scientific), 1% Anti-anti (15240062,  
394 Thermo Fisher Scientific), 0.5% Glutamax (35050061, Thermo Fisher Scientific), 0.1mM  $\beta$ -  
395 mercaptoethanol, 1000U/mL LIF (ESG1107, Millipore, <http://www.emdmillipore.com>), 1  $\mu$ M  
396 PD0325901 (Selleck Chemicals, <http://www.selleckchem.com>), 3  $\mu$ M CHIR99021 (Selleck  
397 Chemicals).

398

399 Puromycin/zeocin killing doses were established by plating single cells on Matrigel coated plates  
400 (with ROCK inhibitor for human stem cells). The following day cells were treated with culture  
401 media containing increasing doses of puromycin/zeocin. After 24 hours, cells were viewed under  
402 the microscope and the lowest dose resulting in ~100% cell death was selected for future KI  
403 experiments. For E14TG2a mESCs a puromycin dose of 3  $\mu$ g/mL was used. For H7 and H9, 0.6  
404  $\mu$ g/mL of puromycin or 25  $\mu$ g/mL of zeocin; and for IMR90-4 and EP1 0.9  $\mu$ g/mL of puromycin  
405 or 40  $\mu$ g/mL of zeocin was used. Since the optimal dose can vary, we recommend performing  
406 dose response experiments for each cell type.

407

#### 408 **Transfection and transient selection KI**

409 Human stem cells:

410 Human PSCs were plated at 50K per well of a 24 well plate in mTeSR1 media with ROCK  
411 inhibitor, blebbistatin. The following day, (for one well) 0.35  $\mu$ g of all-in-one Cas9 plasmid and  
412 0.75  $\mu$ g of donor plasmid were combined with Opti-MEM (31985062, Thermo Fisher Scientific)  
413 to a total volume of 48  $\mu$ L. For transfection tests, Cas9-P2A-mKate2 or lenti-CMV-eGFP (9 kb)  
414 plasmids were used. Cas9-P2A-mKate2 was modified from PX458 (Addgene #48138) by

415 replacing GFP with mKate2. Transfection mix was prepared by adding 2  $\mu$ L of DNA-In Stem  
416 (GST-2130, MTI-GlobalStem) to the DNA+Opti-MEM mix from above. The mix was incubated  
417 for 10 minutes at room temperature before distributing it to the cells. The next day the cells were  
418 fed with fresh media. At ~40 hours after transfection, the cells were selected with 0.5-1.0  $\mu$ g/mL  
419 of puromycin for 24 hours. Following selection, the cells were allowed to recover for 5-7 days  
420 and then passaged as 500-1000 single cells per well of a 6 well plate for colony formation. These  
421 cells were maintained for 7-10 days before colony picking and PCR analysis.

422

423 Mouse stem cells:

424 mESCs were passaged and plated as 100K per well of a 6 well plate the day before transfection.  
425 The following day, (for one well) 1  $\mu$ g of all-in-one Cas9 plasmid and 2  $\mu$ g of donor plasmid  
426 were combined with Opti-MEM to a total volume of 145  $\mu$ L. After mixing, 5  $\mu$ L of DNA-In  
427 Stem were added to the solution for a 15 minute incubation at room temperature before  
428 distribution to a plate well. 24 hours after transfection the cells were selected with 3  $\mu$ g/mL of  
429 puromycin for 24 hours. Following selection, the cells were allowed to recover for 1 day and  
430 then passaged as 750 single cells per well of a 6 well plate for colony formation. These cells  
431 were maintained for 5 days before colony picking and PCR analysis

432

433 Note MTI-GlobalStem is now part of Thermo Fisher Scientific which recommends that DNA-In  
434 Stem should be replaced by Lipofectamine Stem (STEM00015).

435

436 **Flow cytometry**

437 The gates for reporter negative cells were set based upon values of untransfected PSCs of the line  
438 being analyzed. Side scatter height versus width linear alignment filters were used to minimize  
439 cell aggregates. Cells were dissociated to a single cell suspension using Accumax (07921,  
440 Stemcell Technologies). The SH-800 Cell Sorter (Sony Biotechnology, San Jose, CA,  
441 <https://www.sonybiotechnology.com>) was used for analysis.

442

#### 443 **Microscopy**

444 Fluorescence images were taken using the Eclipse TE-2000S inverted microscope (Nikon,  
445 Tokyo, Japan, <http://www.nikon.com>) or the EVOS FL Auto 2 Cell Imaging System (Thermo  
446 Fisher Scientific).

447

#### 448 **Karyotyping/off-target effects**

449 Karyotyping analysis of the EP1-RGC reporter line was performed using the KaryoStat™  
450 Analysis Service (Thermo Fisher Scientific, A38153) and no chromosomal aberrations were  
451 found. To test the EP1-RGC reporter line for CRISPR off-target effects, we performed PCR and  
452 sequenced the 4 most likely off-targets as assessed by the CCTop online tool(44)  
453 (<https://crispr.cos.uni-heidelberg.de>).

454

#### 455 **Stem cell differentiation**

456 Human:

457 A homozygous *BRN3B-P2A-tdTomato-P2A-Thy1.2* reporter clone was isolated from EP1 hiPSCs  
458 and differentiated to RGCs using our previously published protocol(11).

459 Mouse:

460 A homozygous *Six6-P2A-eGFP* reporter clone was isolated from E14TG2a mESCs and  
461 differentiated to optic vesicles using the published protocol(33).

462

#### 463 **Statistical analysis:**

464 An unpaired two tailed t-test was used as indicated. Statistics were analyzed in GraphPad  
465 Prism7.

466

467

#### 468 **Competing interests:**

469

470 Disclosure: **V.M. Sluch, D.S. Rice** Novartis Institutes for BioMedical Research, employment; **X.**

471 **Chamling, C. Wenger, Y. Duan, and D.J. Zack** declare no competing interests.

472

473

#### 474 **Acknowledgments:**

475 This work was supported by grants from the NIH (including 5P30EY001765), Maryland  
476 Stem Cell Research Fund, Foundation Fighting Blindness, BrightFocus Foundation, Thome  
477 Foundation, and unrestricted funds from Research to Prevent Blindness, Inc., and generous gifts  
478 from the Guerrieri Family Foundation.

479

#### 480 **References:**

- 481 1. Sluch VM, Zack DJ. Stem cells, retinal ganglion cells and glaucoma. *Dev Ophthalmol.*  
482 2014;53:111-21.
- 483 2. Chamling X, Sluch VM, Zack DJ. The Potential of Human Stem Cells for the Study and Treatment  
484 of Glaucoma. *Invest Ophthalmol Vis Sci.* 2016;57(5):ORSFi1-6.
- 485 3. Shi Y, Inoue H, Wu JC, Yamanaka S. Induced pluripotent stem cell technology: a decade of  
486 progress. *Nat Rev Drug Discov.* 2017;16(2):115-30.
- 487 4. Schwartz SD, Regillo CD, Lam BL, Elliott D, Rosenfeld PJ, Gregori NZ, et al. Human embryonic  
488 stem cell-derived retinal pigment epithelium in patients with age-related macular degeneration and  
489 Stargardt's macular dystrophy: follow-up of two open-label phase 1/2 studies. *Lancet.*  
490 2015;385(9967):509-16.

- 491 5. Mandai M, Watanabe A, Kurimoto Y, Hiram Y, Morinaga C, Daimon T, et al. Autologous Induced  
492 Stem-Cell-Derived Retinal Cells for Macular Degeneration. *N Engl J Med.* 2017;376(11):1038-46.
- 493 6. da Cruz L, Fynes K, Georgiadis O, Kerby J, Luo YH, Ahmado A, et al. Phase 1 clinical study of an  
494 embryonic stem cell-derived retinal pigment epithelium patch in age-related macular degeneration. *Nat*  
495 *Biotechnol.* 2018;36(4):328-37.
- 496 7. Kashani AH, Lebkowski JS, Rahhal FM, Avery RL, Salehi-Had H, Dang W, et al. A bioengineered  
497 retinal pigment epithelial monolayer for advanced, dry age-related macular degeneration. *Sci Transl*  
498 *Med.* 2018;10(435).
- 499 8. Gaj T, Gersbach CA, Barbas CF, 3rd. ZFN, TALEN, and CRISPR/Cas-based methods for genome  
500 engineering. *Trends Biotechnol.* 2013;31(7):397-405.
- 501 9. Soldner F, Stelzer Y, Shivalila CS, Abraham BJ, Latourelle JC, Barrasa MI, et al. Parkinson-  
502 associated risk variant in distal enhancer of alpha-synuclein modulates target gene expression. *Nature.*  
503 2016;533(7601):95-9.
- 504 10. Phillips MJ, Capowski EE, Petersen A, Jansen AD, Barlow K, Edwards KL, et al. Generation of a  
505 rod-specific NRL reporter line in human pluripotent stem cells. *Sci Rep.* 2018;8(1):2370.
- 506 11. Sluch VM, Chamling X, Liu MM, Berlinicke CA, Cheng J, Mitchell KL, et al. Enhanced Stem Cell  
507 Differentiation and Immunopurification of Genome Engineered Human Retinal Ganglion Cells. *Stem Cells*  
508 *Transl Med.* 2017;6(11):1972-86.
- 509 12. Sluch VM, Davis CH, Ranganathan V, Kerr JM, Krick K, Martin R, et al. Differentiation of human  
510 ESCs to retinal ganglion cells using a CRISPR engineered reporter cell line. *Sci Rep.* 2015;5:16595.
- 511 13. Maruotti J, Sripathi SR, Bharti K, Fuller J, Wahlin KJ, Ranganathan V, et al. Small-molecule-  
512 directed, efficient generation of retinal pigment epithelium from human pluripotent stem cells. *Proc*  
513 *Natl Acad Sci U S A.* 2015;112(35):10950-5.
- 514 14. Yang L, Guell M, Byrne S, Yang JL, De Los Angeles A, Mali P, et al. Optimization of scarless human  
515 stem cell genome editing. *Nucleic Acids Res.* 2013;41(19):9049-61.
- 516 15. Zhu Z, Verma N, Gonzalez F, Shi ZD, Huangfu D. A CRISPR/Cas-Mediated Selection-free Knockin  
517 Strategy in Human Embryonic Stem Cells. *Stem Cell Reports.* 2015;4(6):1103-11.
- 518 16. Ding Q, Regan SN, Xia Y, Ostrom LA, Cowan CA, Musunuru K. Enhanced efficiency of human  
519 pluripotent stem cell genome editing through replacing TALENs with CRISPRs. *Cell Stem Cell.*  
520 2013;12(4):393-4.
- 521 17. Ding Q, Lee YK, Schaefer EA, Peters DT, Veres A, Kim K, et al. A TALEN genome-editing system for  
522 generating human stem cell-based disease models. *Cell Stem Cell.* 2013;12(2):238-51.
- 523 18. Yu C, Liu Y, Ma T, Liu K, Xu S, Zhang Y, et al. Small molecules enhance CRISPR genome editing in  
524 pluripotent stem cells. *Cell Stem Cell.* 2015;16(2):142-7.
- 525 19. Lin S, Staahl BT, Alla RK, Doudna JA. Enhanced homology-directed human genome engineering  
526 by controlled timing of CRISPR/Cas9 delivery. *Elife.* 2014;3:e04766.
- 527 20. He X, Tan C, Wang F, Wang Y, Zhou R, Cui D, et al. Knock-in of large reporter genes in human  
528 cells via CRISPR/Cas9-induced homology-dependent and independent DNA repair. *Nucleic Acids Res.*  
529 2016;44(9):e85.
- 530 21. Gonzalez F, Zhu Z, Shi ZD, Lelli K, Verma N, Li QV, et al. An iCRISPR platform for rapid,  
531 multiplexable, and inducible genome editing in human pluripotent stem cells. *Cell Stem Cell.*  
532 2014;15(2):215-26.
- 533 22. Kim S, Kim D, Cho SW, Kim J, Kim JS. Highly efficient RNA-guided genome editing in human cells  
534 via delivery of purified Cas9 ribonucleoproteins. *Genome Res.* 2014;24(6):1012-9.
- 535 23. Petris G, Casini A, Montagna C, Lorenzin F, Prandi D, Romanel A, et al. Hit and go CAS9 delivered  
536 through a lentiviral based self-limiting circuit. *Nat Commun.* 2017;8:15334.
- 537 24. Chen Y, Cao J, Xiong M, Petersen AJ, Dong Y, Tao Y, et al. Engineering Human Stem Cell Lines  
538 with Inducible Gene Knockout using CRISPR/Cas9. *Cell Stem Cell.* 2015;17(2):233-44.

- 539 25. Merkle FT, Neuhausser WM, Santos D, Valen E, Gagnon JA, Maas K, et al. Efficient CRISPR-Cas9-  
540 mediated generation of knockin human pluripotent stem cells lacking undesired mutations at the  
541 targeted locus. *Cell Rep.* 2015;11(6):875-83.
- 542 26. Meier ID, Bernreuther C, Tilling T, Neidhardt J, Wong YW, Schulze C, et al. Short DNA sequences  
543 inserted for gene targeting can accidentally interfere with off-target gene expression. *FASEB J.*  
544 2010;24(6):1714-24.
- 545 27. Wang G, Yang L, Grishin D, Rios X, Ye LY, Hu Y, et al. Efficient, footprint-free human iPSC genome  
546 editing by consolidation of Cas9/CRISPR and piggyBac technologies. *Nat Protoc.* 2017;12(1):88-103.
- 547 28. Bhise NS, Wahlin KJ, Zack DJ, Green JJ. Evaluating the potential of poly(beta-amino ester)  
548 nanoparticles for reprogramming human fibroblasts to become induced pluripotent stem cells. *Int J*  
549 *Nanomedicine.* 2013;8:4641-58.
- 550 29. Wahlin KJ, Maruotti JA, Sripathi SR, Ball J, Angueyra JM, Kim C, et al. Photoreceptor Outer  
551 Segment-like Structures in Long-Term 3D Retinas from Human Pluripotent Stem Cells. *Sci Rep.*  
552 2017;7(1):766.
- 553 30. Mitzelfelt KA, McDermott-Roe C, Grzybowski MN, Marquez M, Kuo CT, Riedel M, et al. Efficient  
554 Precision Genome Editing in iPSCs via Genetic Co-targeting with Selection. *Stem Cell Reports.*  
555 2017;8(3):491-9.
- 556 31. Shy BR, MacDougall MS, Clarke R, Merrill BJ. Co-incident insertion enables high efficiency  
557 genome engineering in mouse embryonic stem cells. *Nucleic Acids Res.* 2016;44(16):7997-8010.
- 558 32. Volkner M, Zschatzsch M, Rostovskaya M, Overall RW, Busskamp V, Anastasiadis K, et al.  
559 Retinal Organoids from Pluripotent Stem Cells Efficiently Recapitulate Retinogenesis. *Stem Cell Reports.*  
560 2016;6(4):525-38.
- 561 33. Assawachananont J, Mandai M, Okamoto S, Yamada C, Eiraku M, Yonemura S, et al.  
562 Transplantation of embryonic and induced pluripotent stem cell-derived 3D retinal sheets into retinal  
563 degenerative mice. *Stem Cell Reports.* 2014;2(5):662-74.
- 564 34. Roy A, de Melo J, Chaturvedi D, Thein T, Cabrera-Socorro A, Houart C, et al. LHX2 is necessary for  
565 the maintenance of optic identity and for the progression of optic morphogenesis. *J Neurosci.*  
566 2013;33(16):6877-84.
- 567 35. Tetreault N, Champagne MP, Bernier G. The LIM homeobox transcription factor Lhx2 is required  
568 to specify the retina field and synergistically cooperates with Pax6 for Six6 trans-activation. *Dev Biol.*  
569 2009;327(2):541-50.
- 570 36. Nakatake Y, Fujii S, Masui S, Sugimoto T, Torikai-Nishikawa S, Adachi K, et al. Kinetics of drug  
571 selection systems in mouse embryonic stem cells. *BMC Biotechnol.* 2013;13:64.
- 572 37. Oji A, Noda T, Fujihara Y, Miyata H, Kim YJ, Muto M, et al. CRISPR/Cas9 mediated genome  
573 editing in ES cells and its application for chimeric analysis in mice. *Sci Rep.* 2016;6:31666.
- 574 38. Den Hartogh SC, Schreurs C, Monshouwer-Kloots JJ, Davis RP, Elliott DA, Mummery CL, et al.  
575 Dual reporter MESP1 mCherry/w-NKX2-5 eGFP/w hESCs enable studying early human cardiac  
576 differentiation. *Stem Cells.* 2015;33(1):56-67.
- 577 39. Steyer B, Bu Q, Cory E, Jiang K, Duong S, Sinha D, et al. Scarless Genome Editing of Human  
578 Pluripotent Stem Cells via Transient Puromycin Selection. *Stem Cell Reports.* 2018;10(2):642-54.
- 579 40. Li K, Wang G, Andersen T, Zhou P, Pu WT. Optimization of genome engineering approaches with  
580 the CRISPR/Cas9 system. *PLoS One.* 2014;9(8):e105779.
- 581 41. Guo Q, Mintier G, Ma-Edmonds M, Storton D, Wang X, Xiao X, et al. 'Cold shock' increases the  
582 frequency of homology directed repair gene editing in induced pluripotent stem cells. *Sci Rep.*  
583 2018;8(1):2080.
- 584 42. Zhang JP, Li XL, Li GH, Chen W, Arakaki C, Botimer GD, et al. Efficient precise knockin with a  
585 double cut HDR donor after CRISPR/Cas9-mediated double-stranded DNA cleavage. *Genome Biol.*  
586 2017;18(1):35.

- 587 43. Naito Y, Hino K, Bono H, Ui-Tei K. CRISPRdirect: software for designing CRISPR/Cas guide RNA  
588 with reduced off-target sites. *Bioinformatics*. 2015;31(7):1120-3.  
589 44. Stemmer M, Thumberger T, Del Sol Keyer M, Wittbrodt J, Mateo JL. CCTop: An Intuitive, Flexible  
590 and Reliable CRISPR/Cas9 Target Prediction Tool. *PLoS One*. 2015;10(4):e0124633.  
591



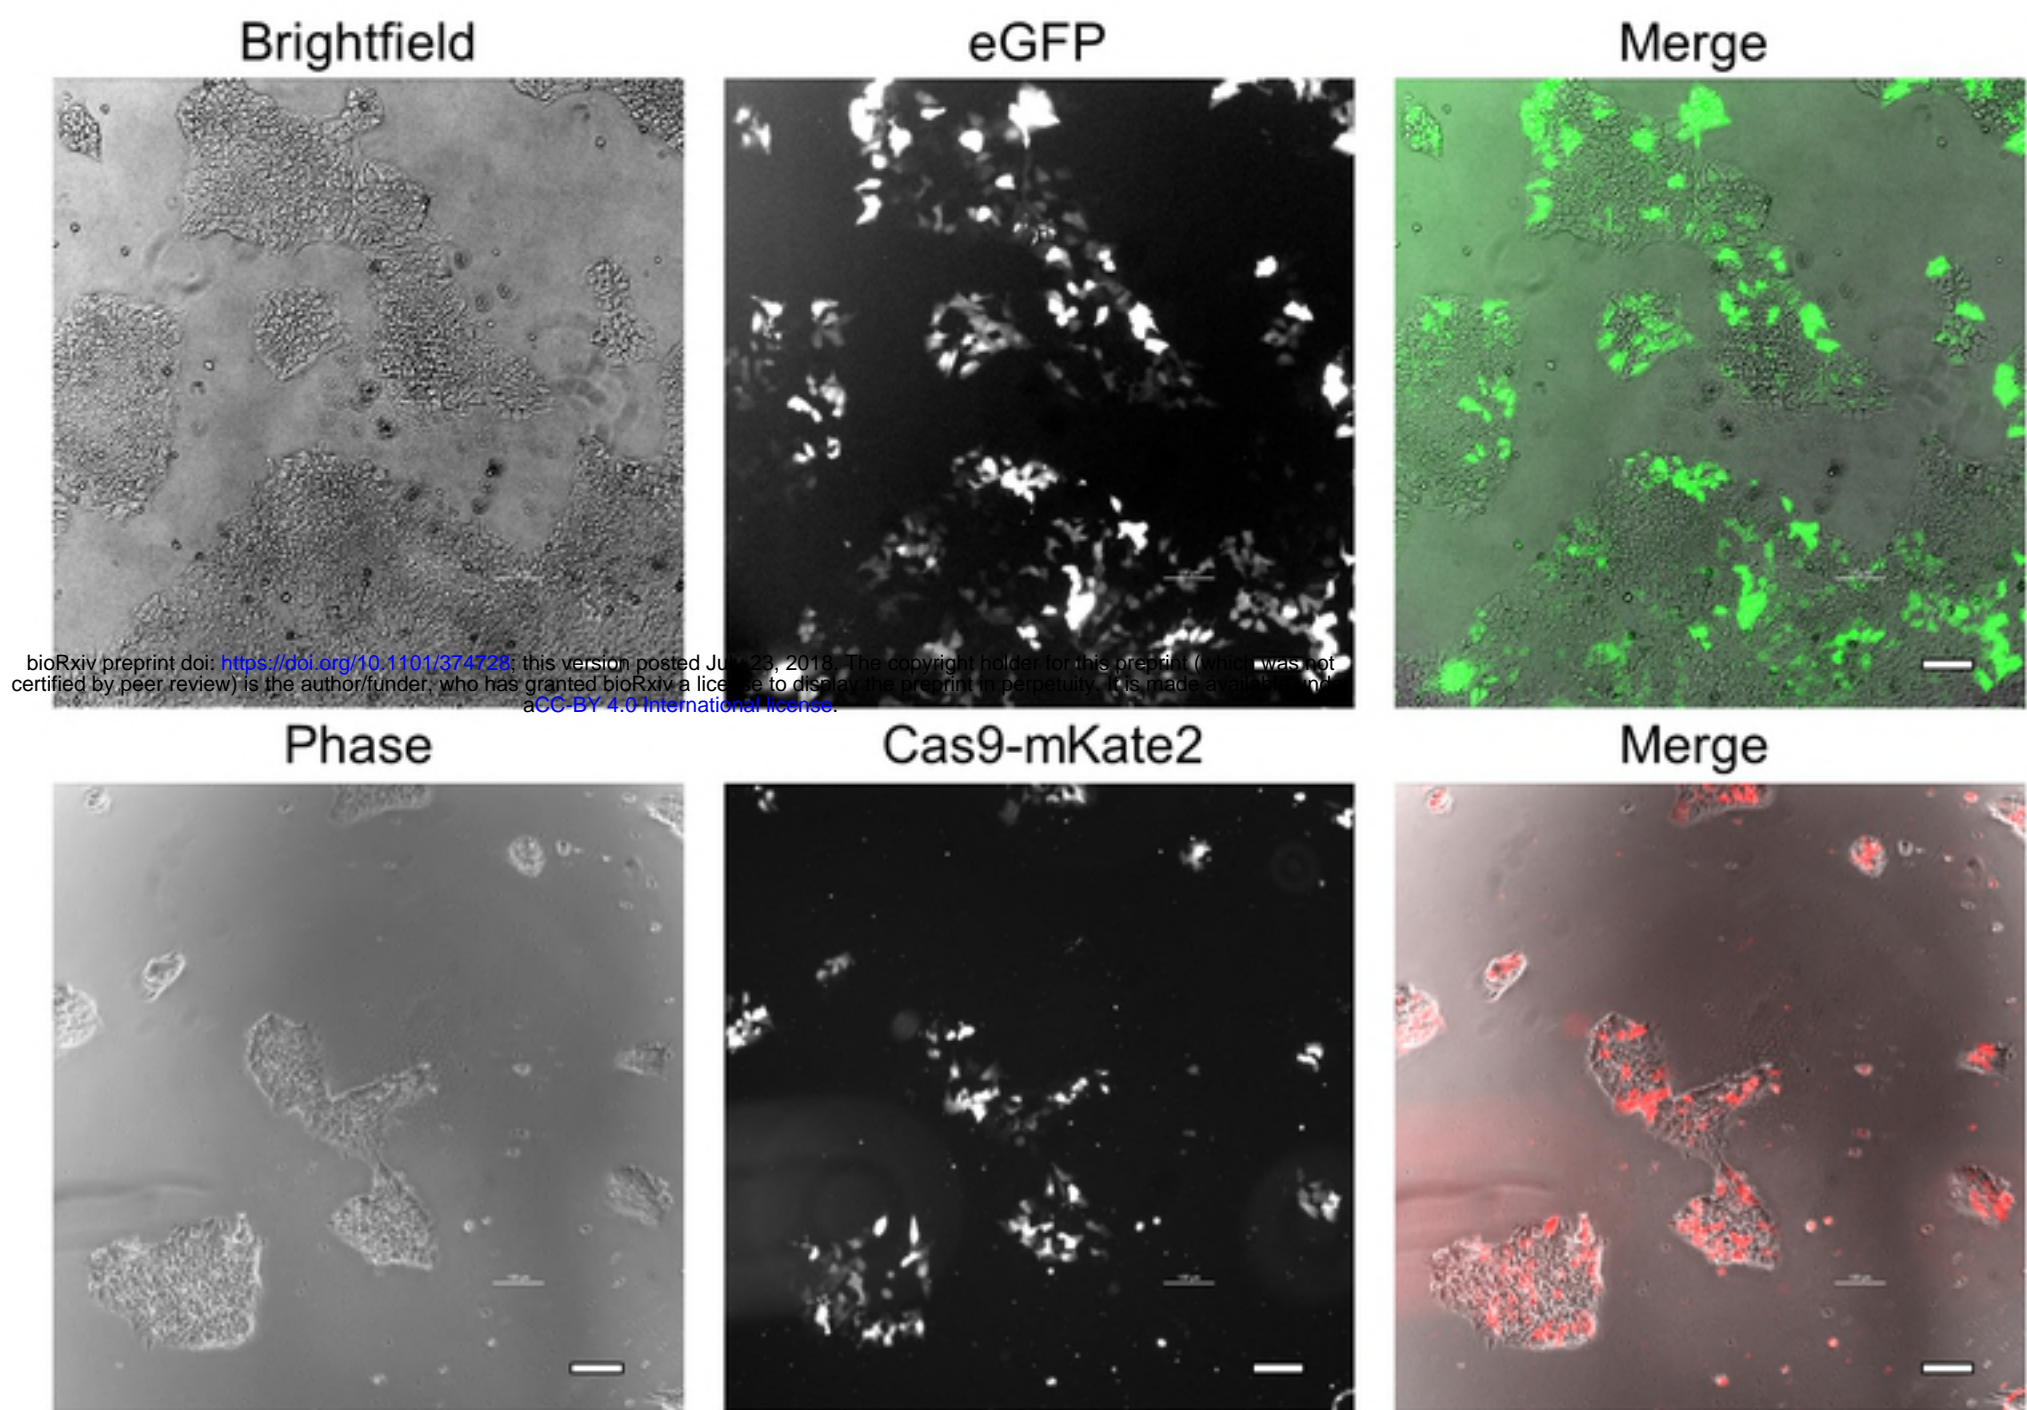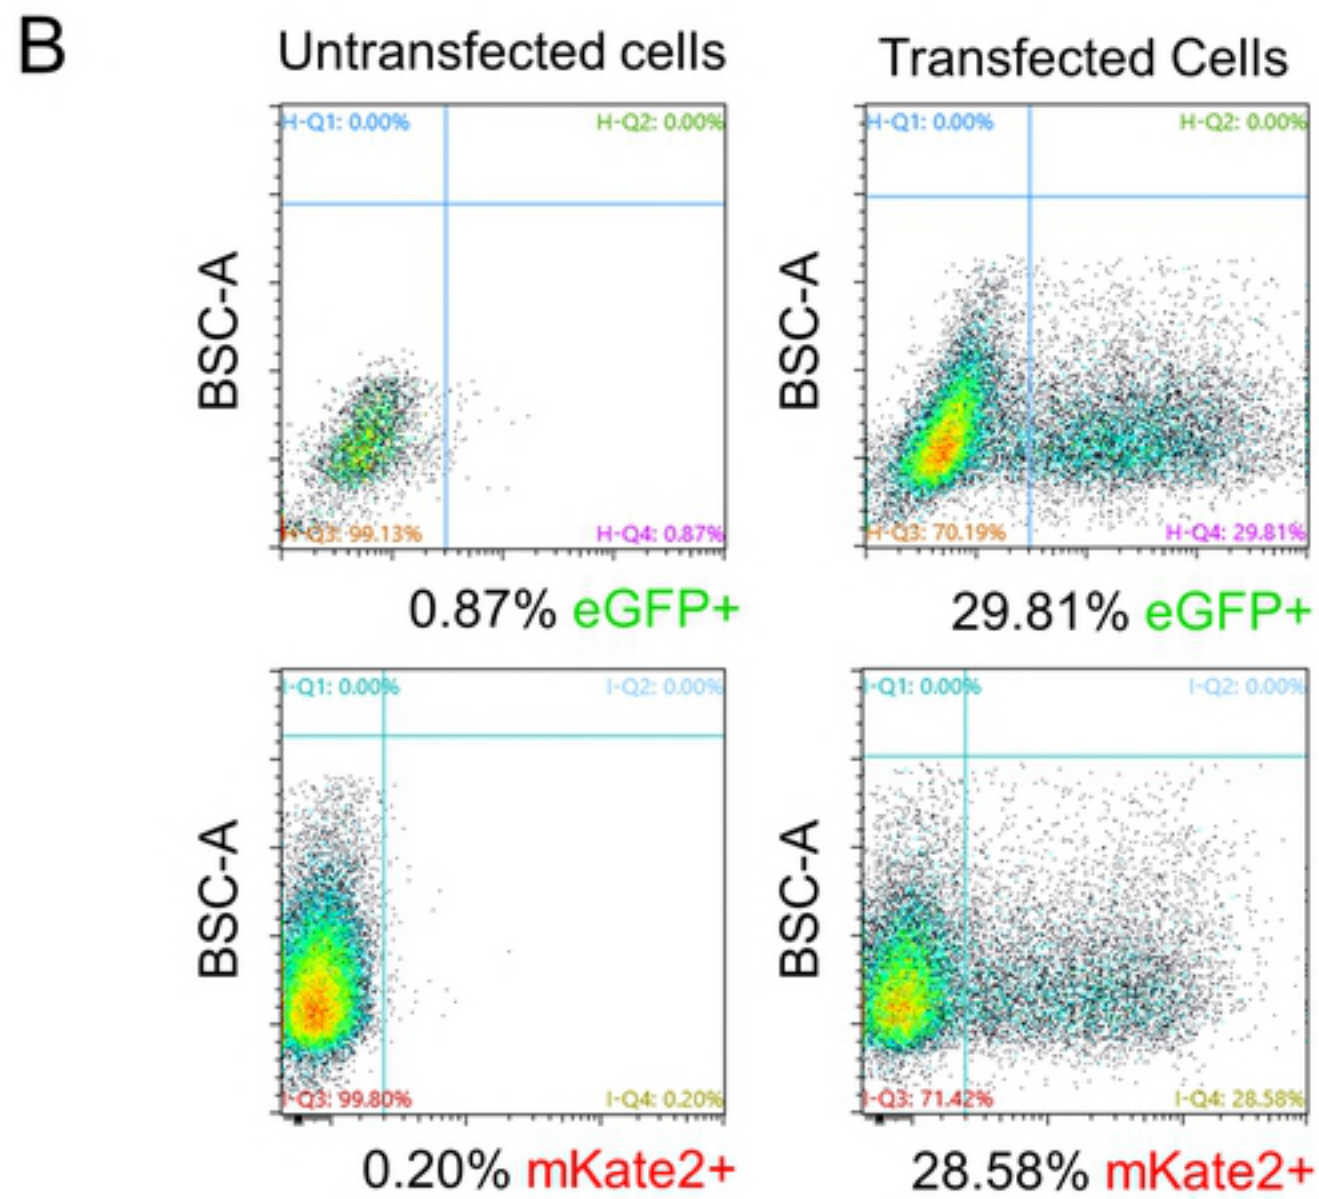

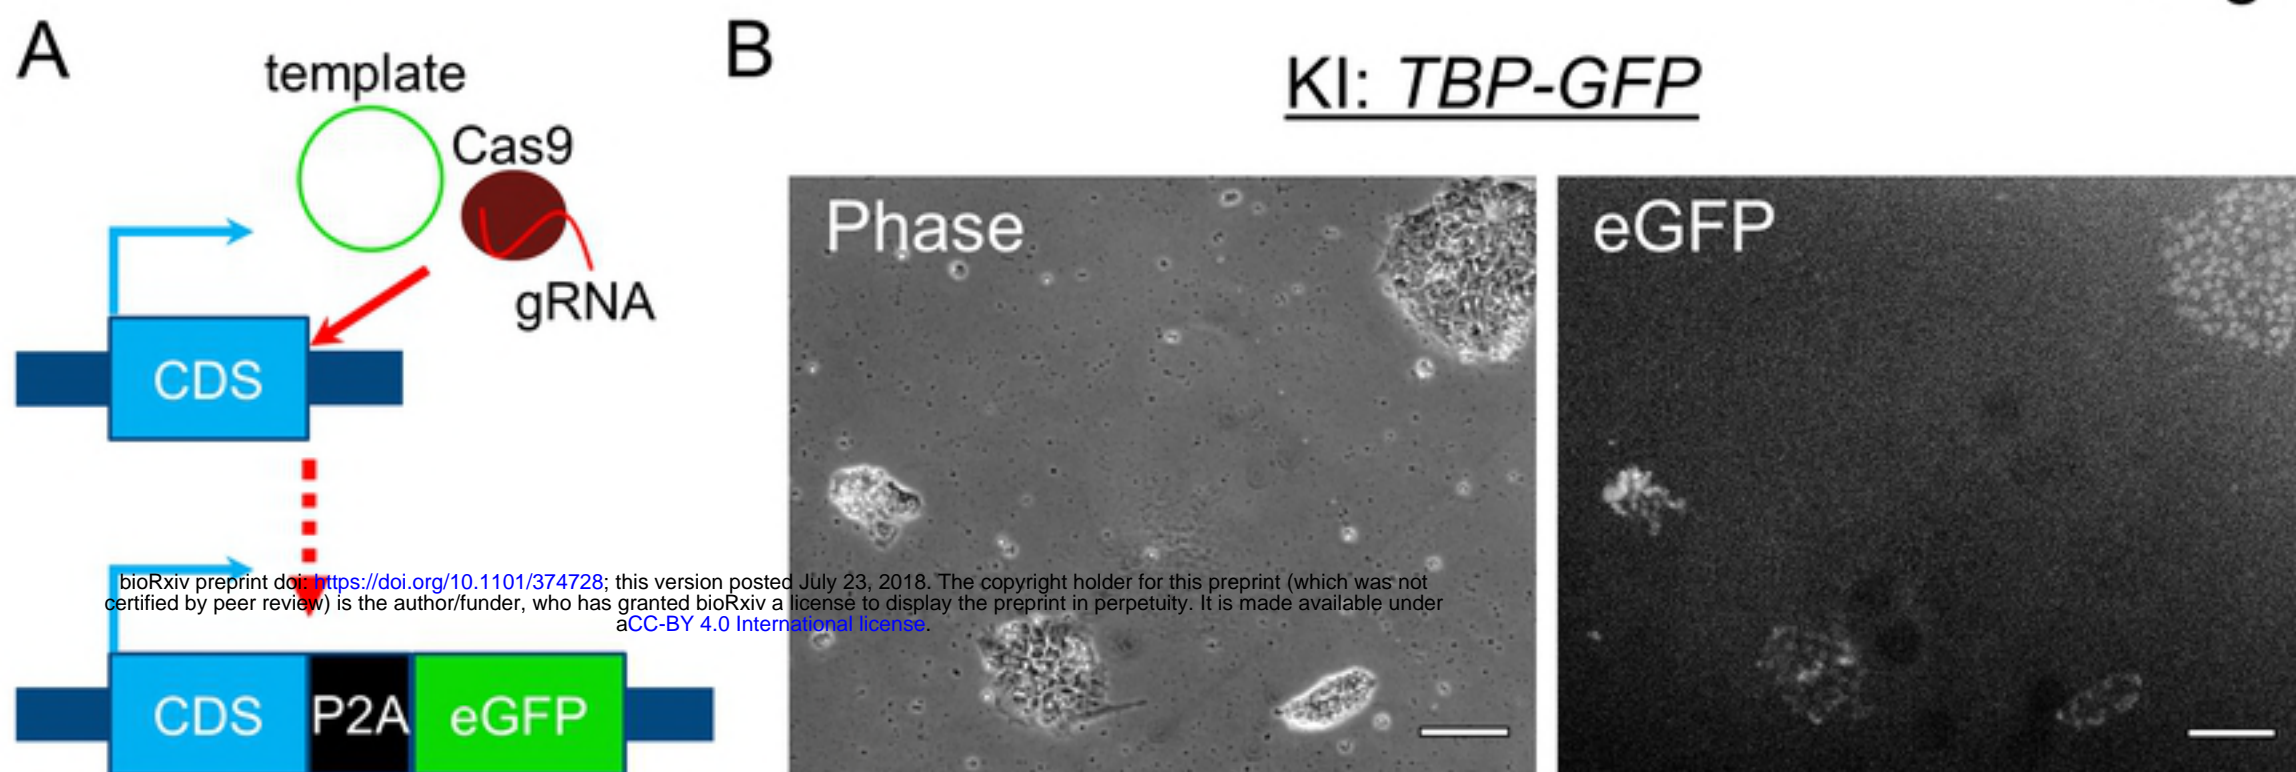

bioRxiv preprint doi: <https://doi.org/10.1101/374728>; this version posted July 23, 2018. The copyright holder for this preprint (which was not certified by peer review) is the author/funder, who has granted bioRxiv a license to display the preprint in perpetuity. It is made available under aCC-BY 4.0 International license.

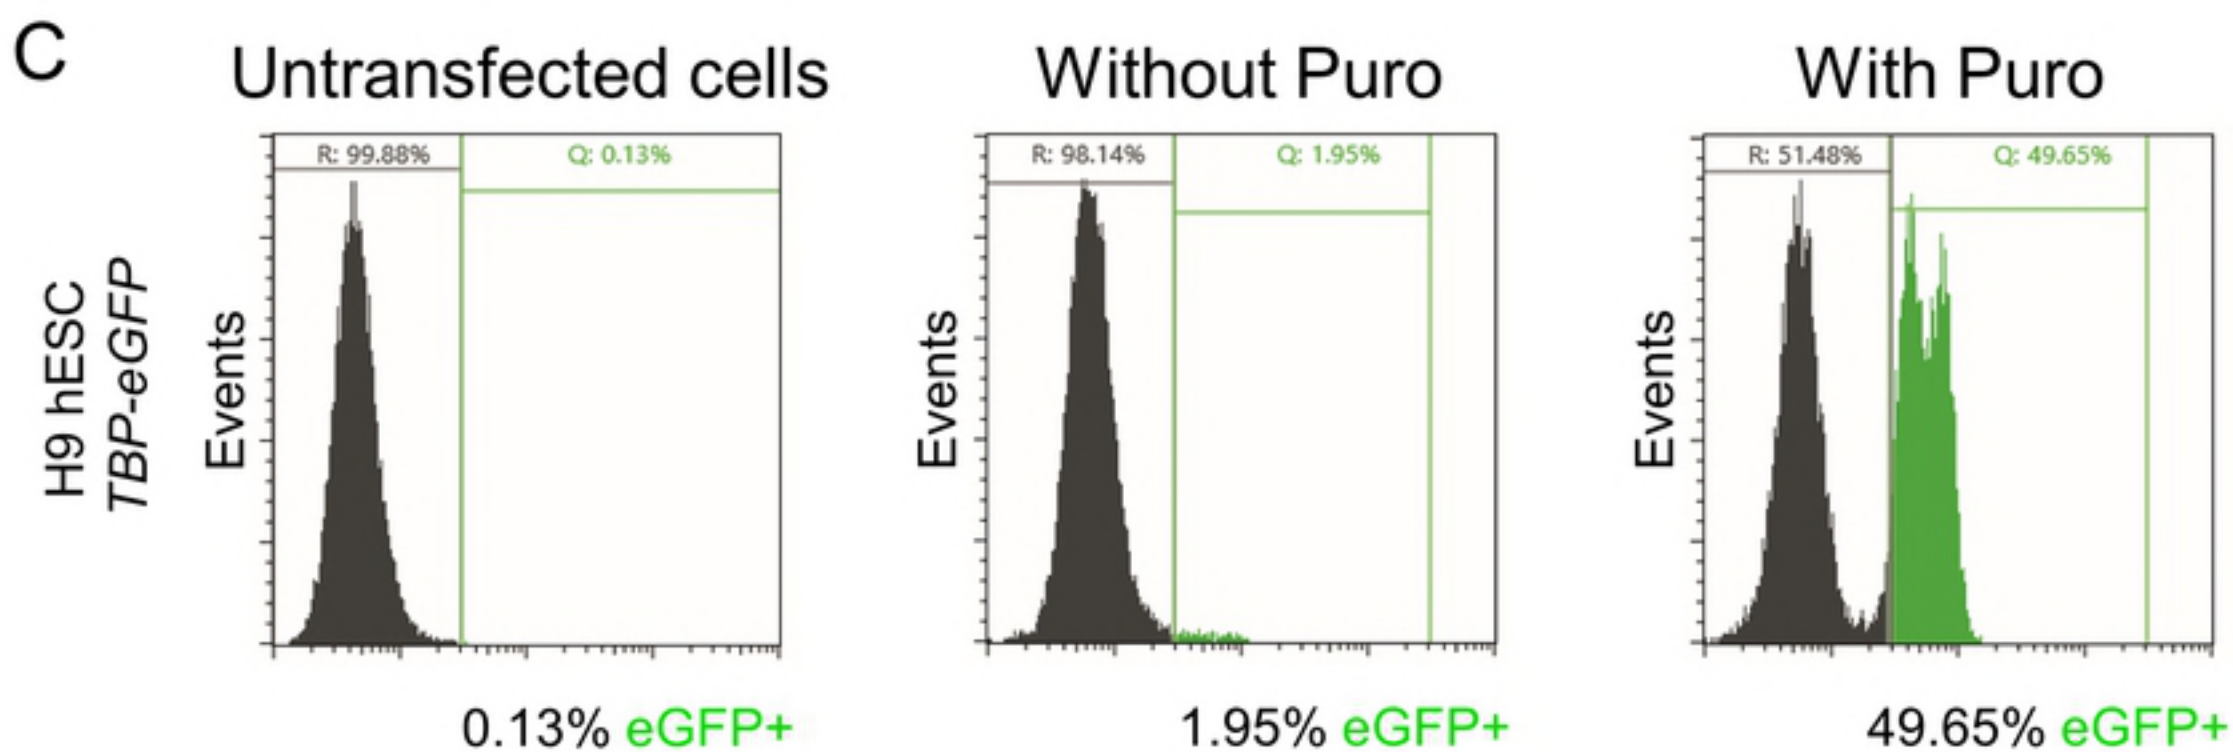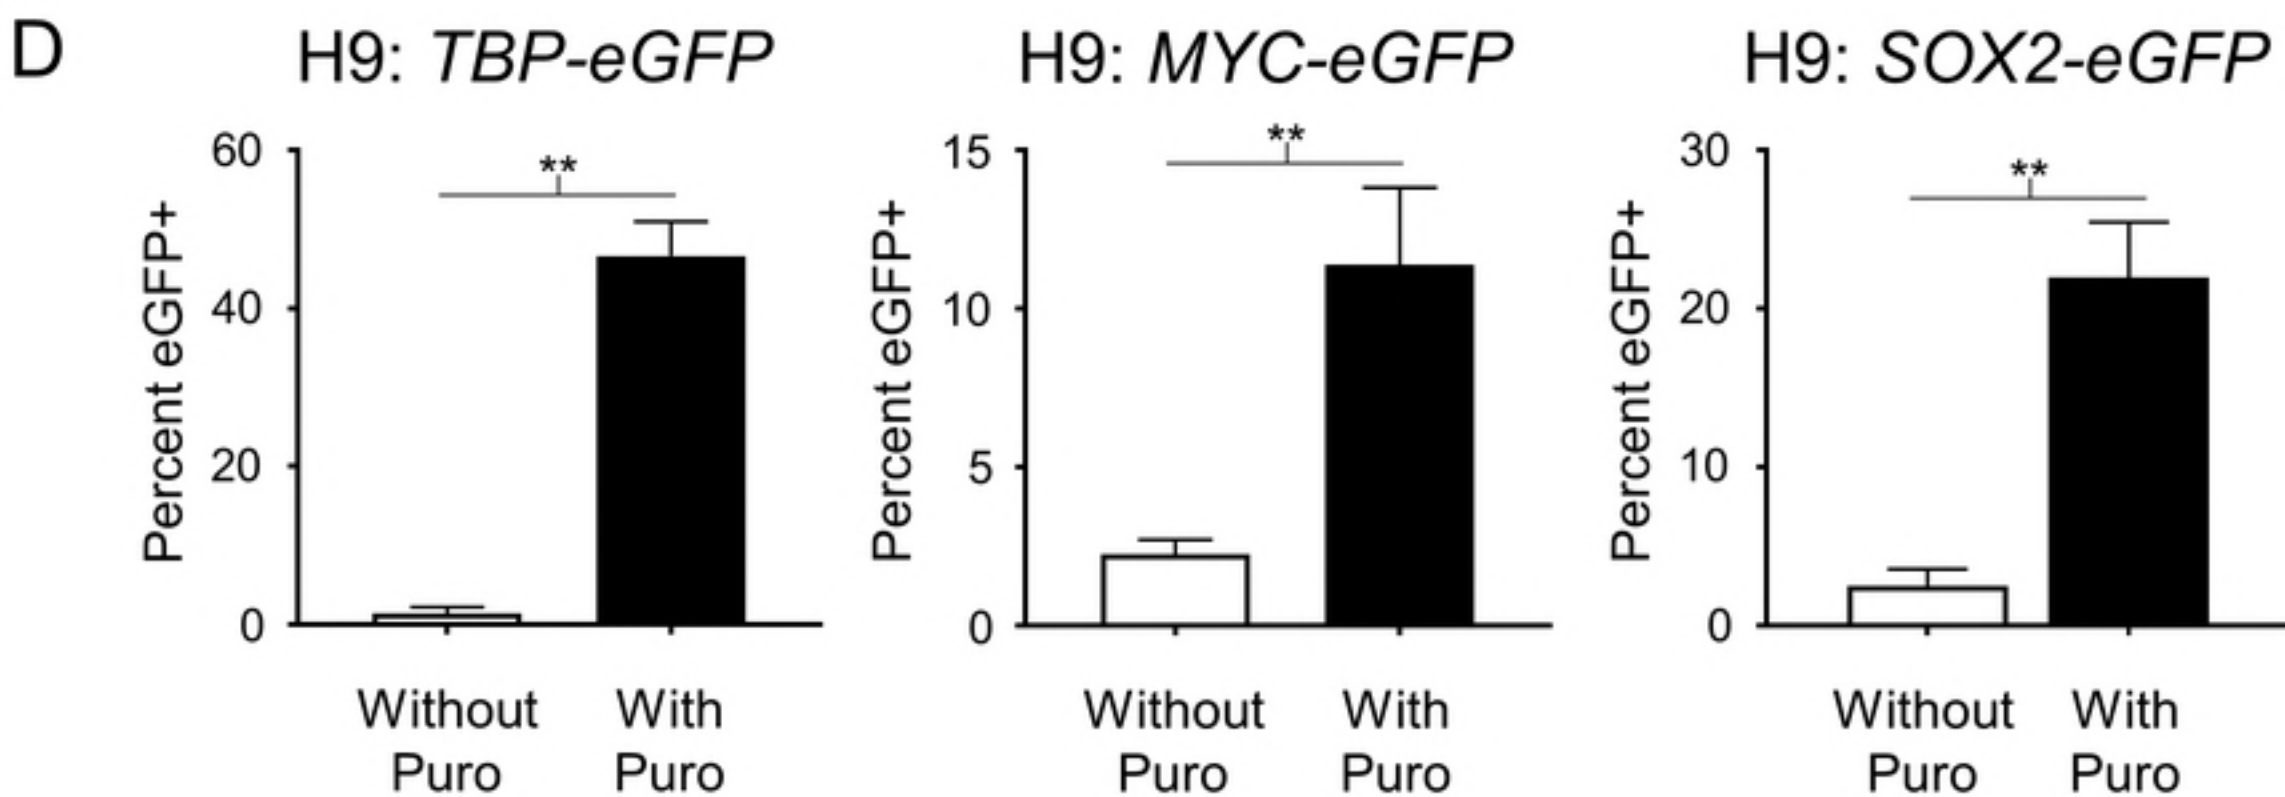

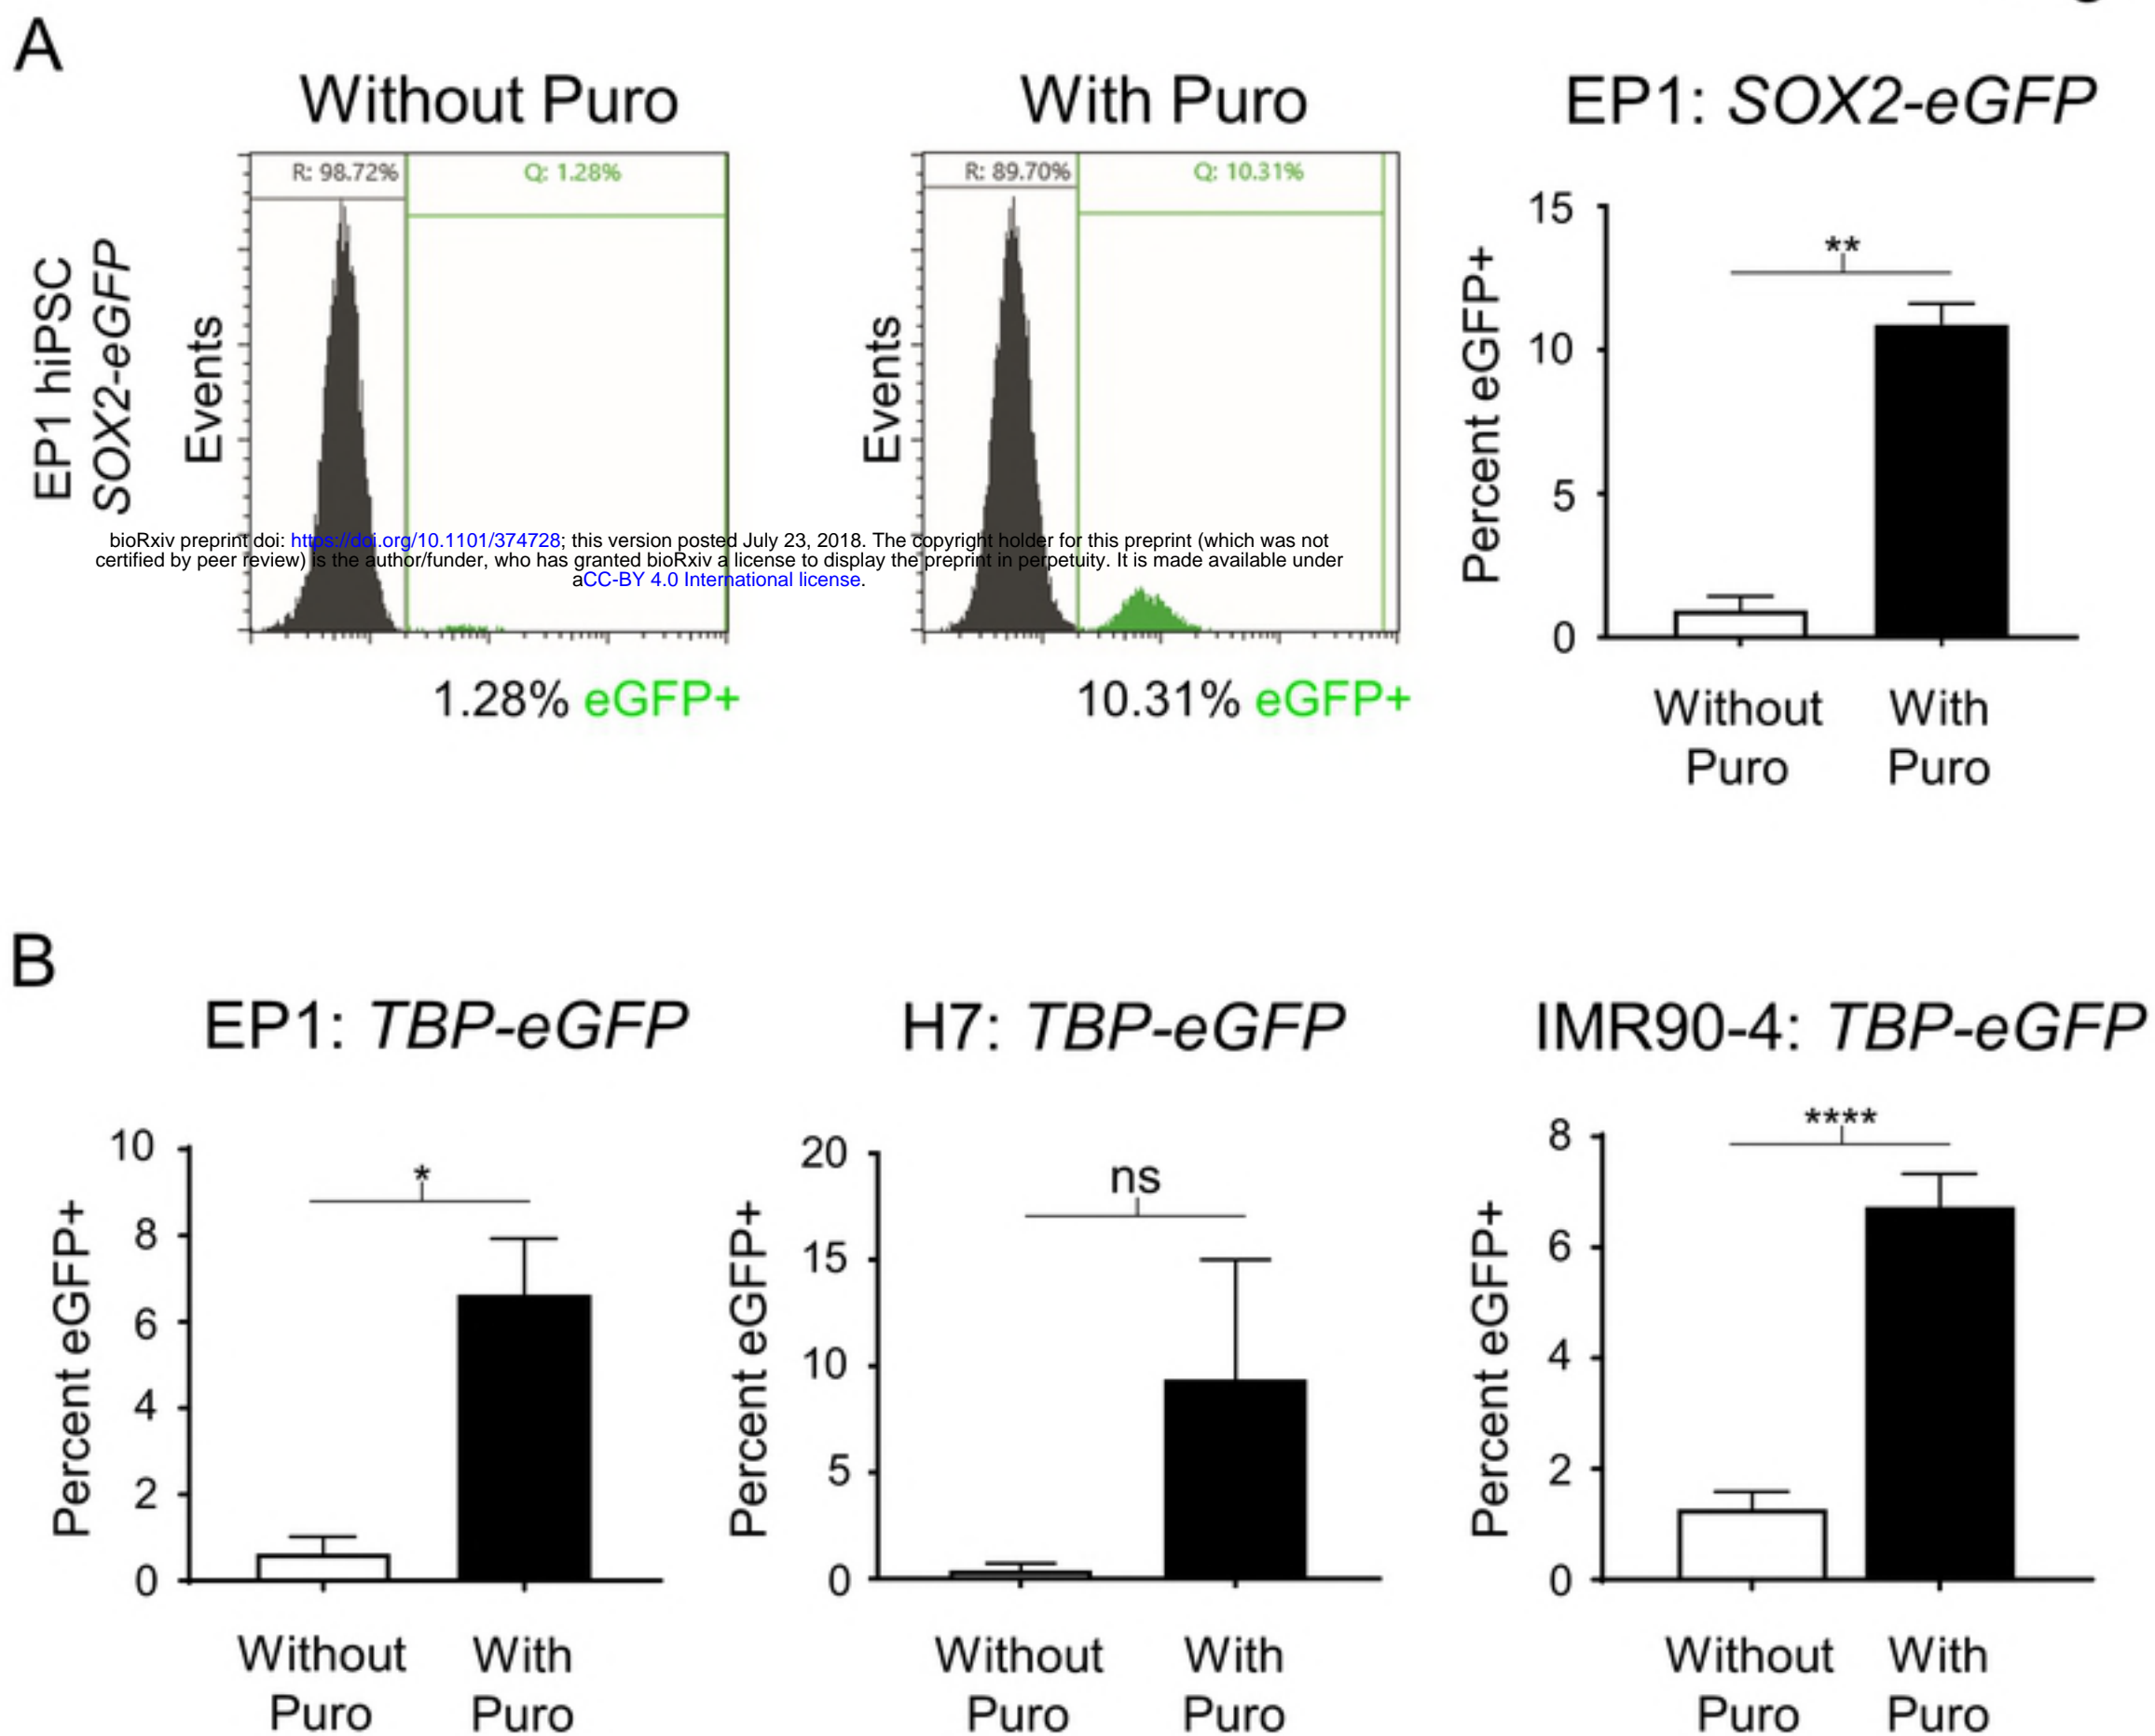

A BRN3B-P2A-tdTomato-P2A-Thy1.2 KI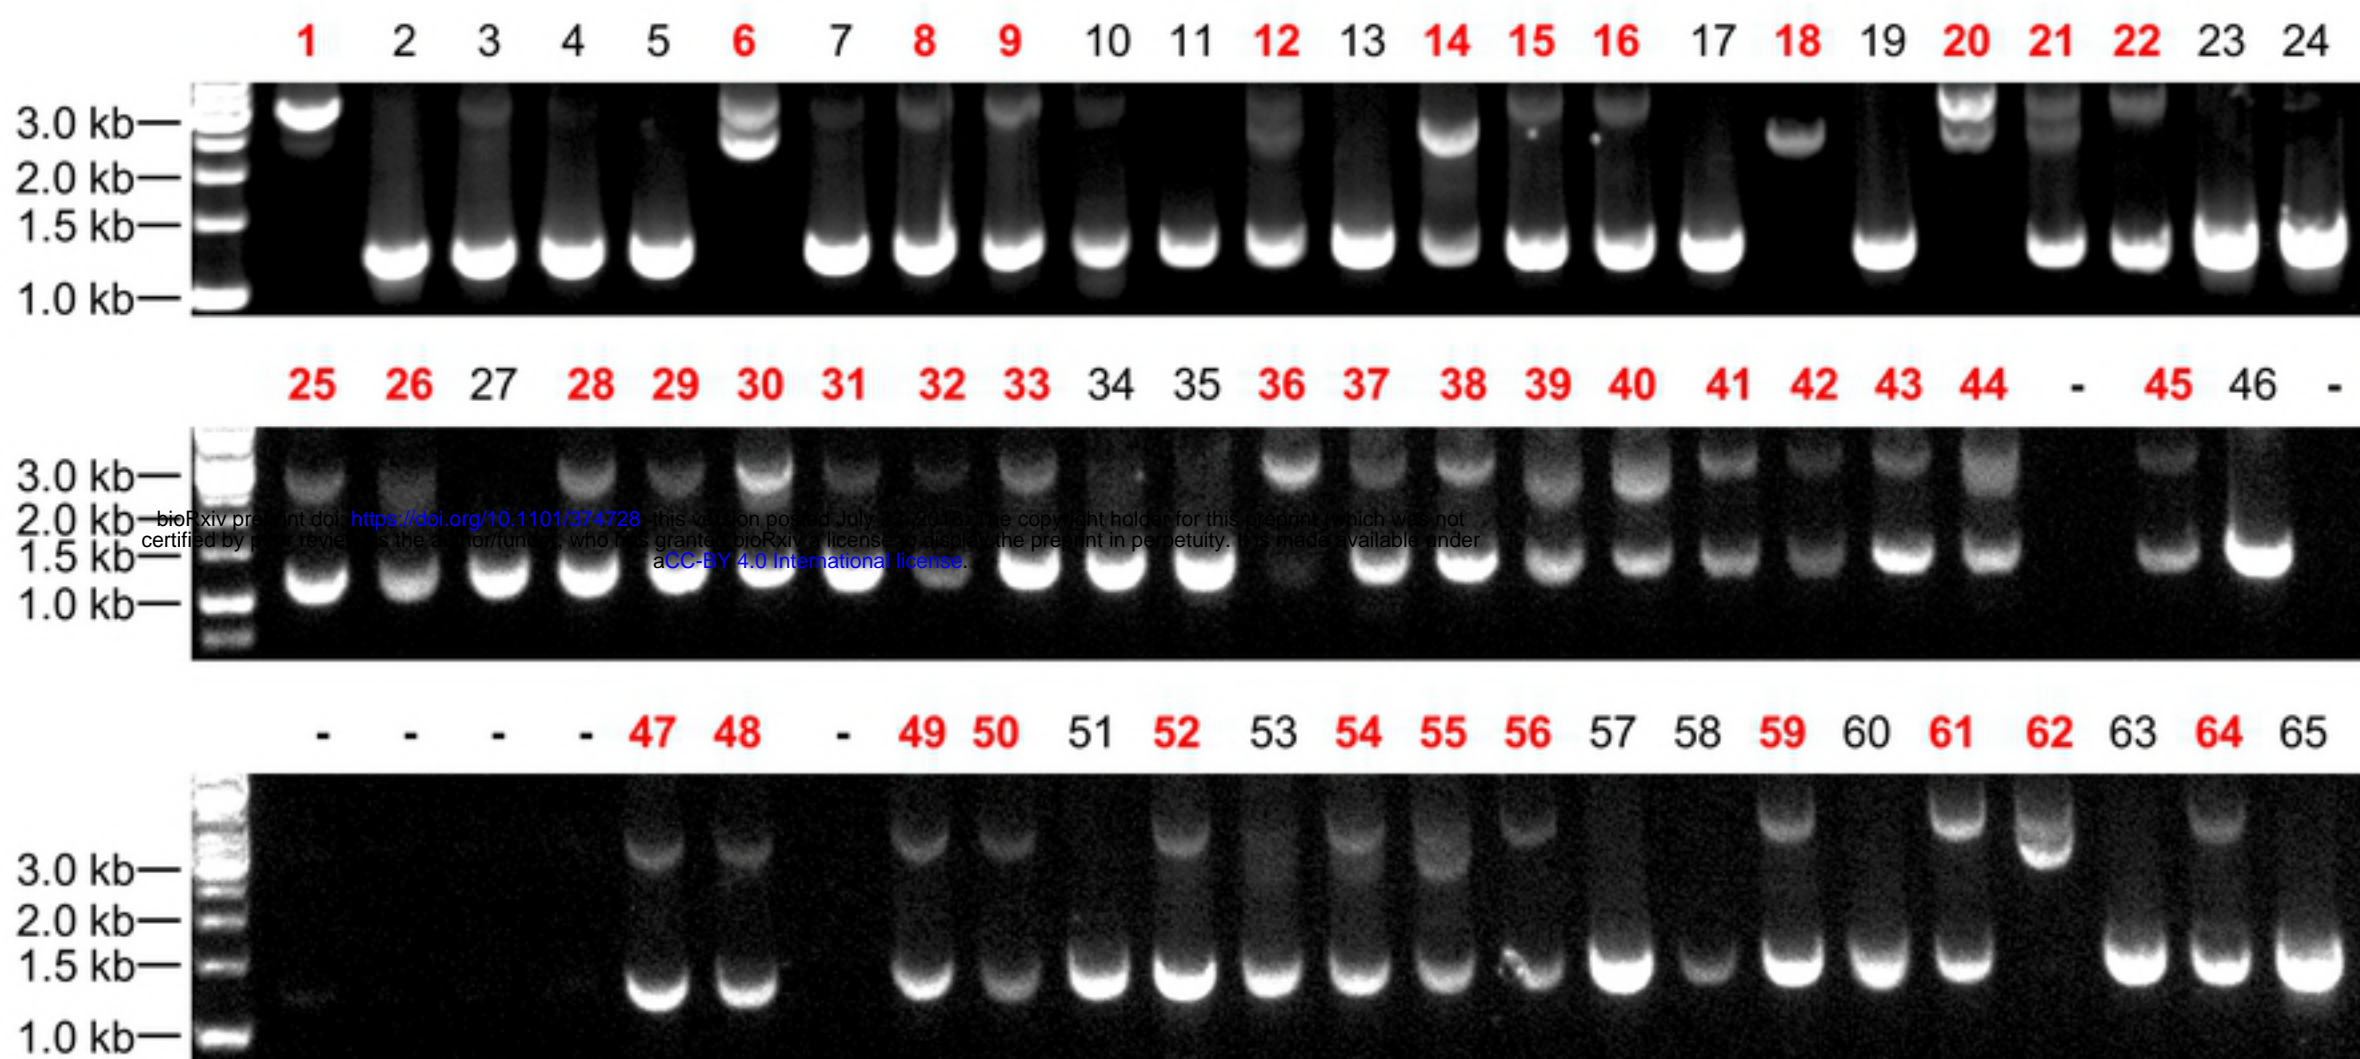PCR: Zygosity/KI test

KI product = 3.3 kb (full tdTomato sequence integration)

WT product = 1.3 kb

KI efficiency:  $42/65 = 64.6\%$ 

## B

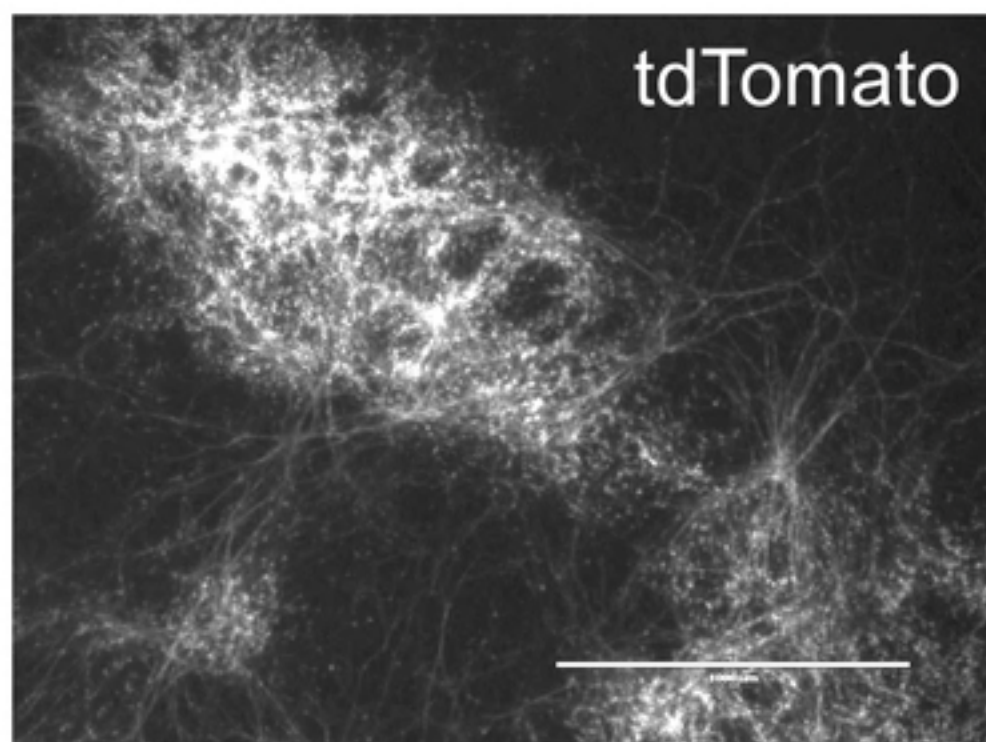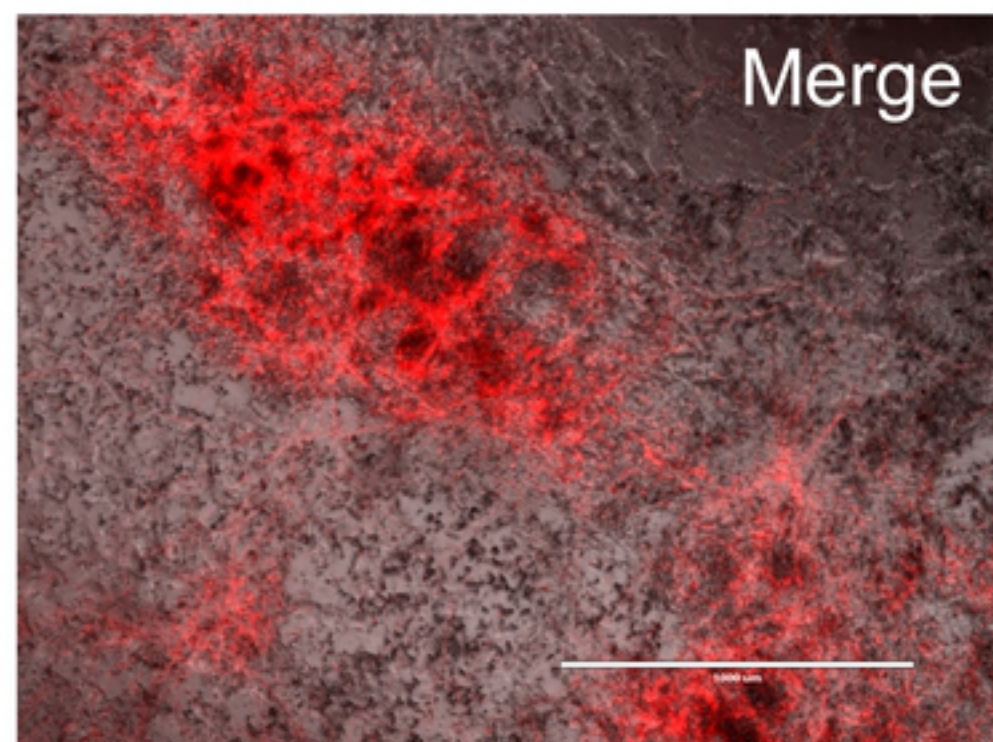

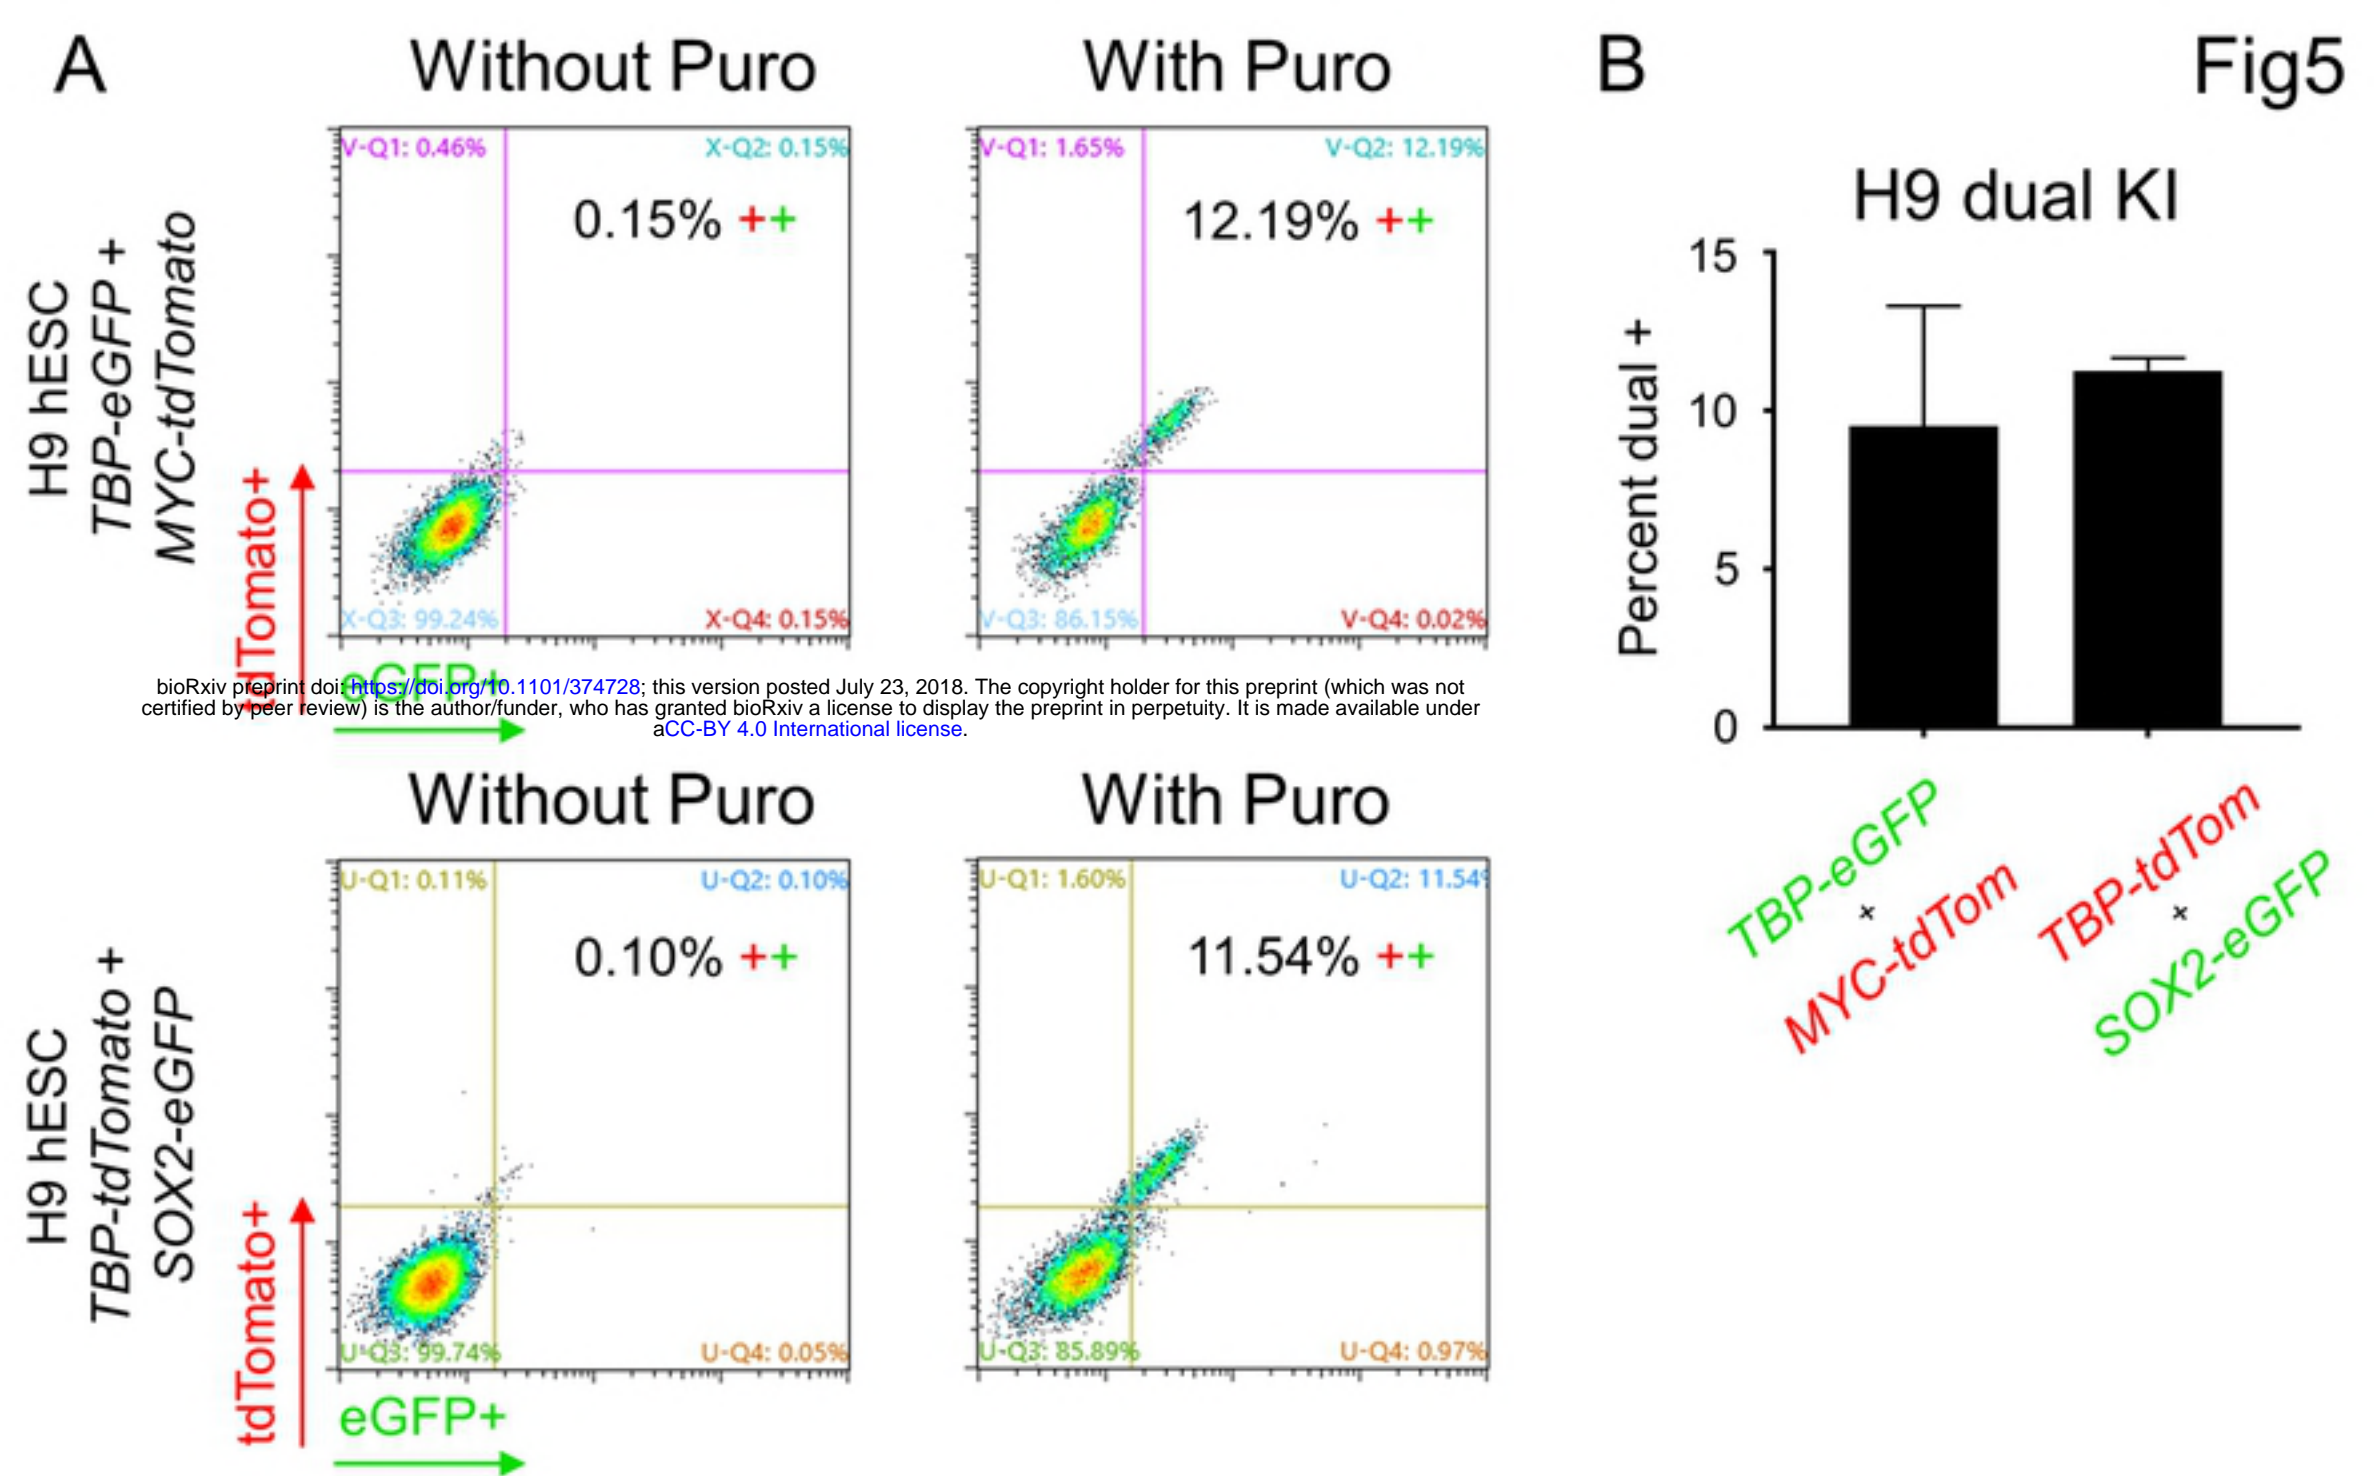

**C**

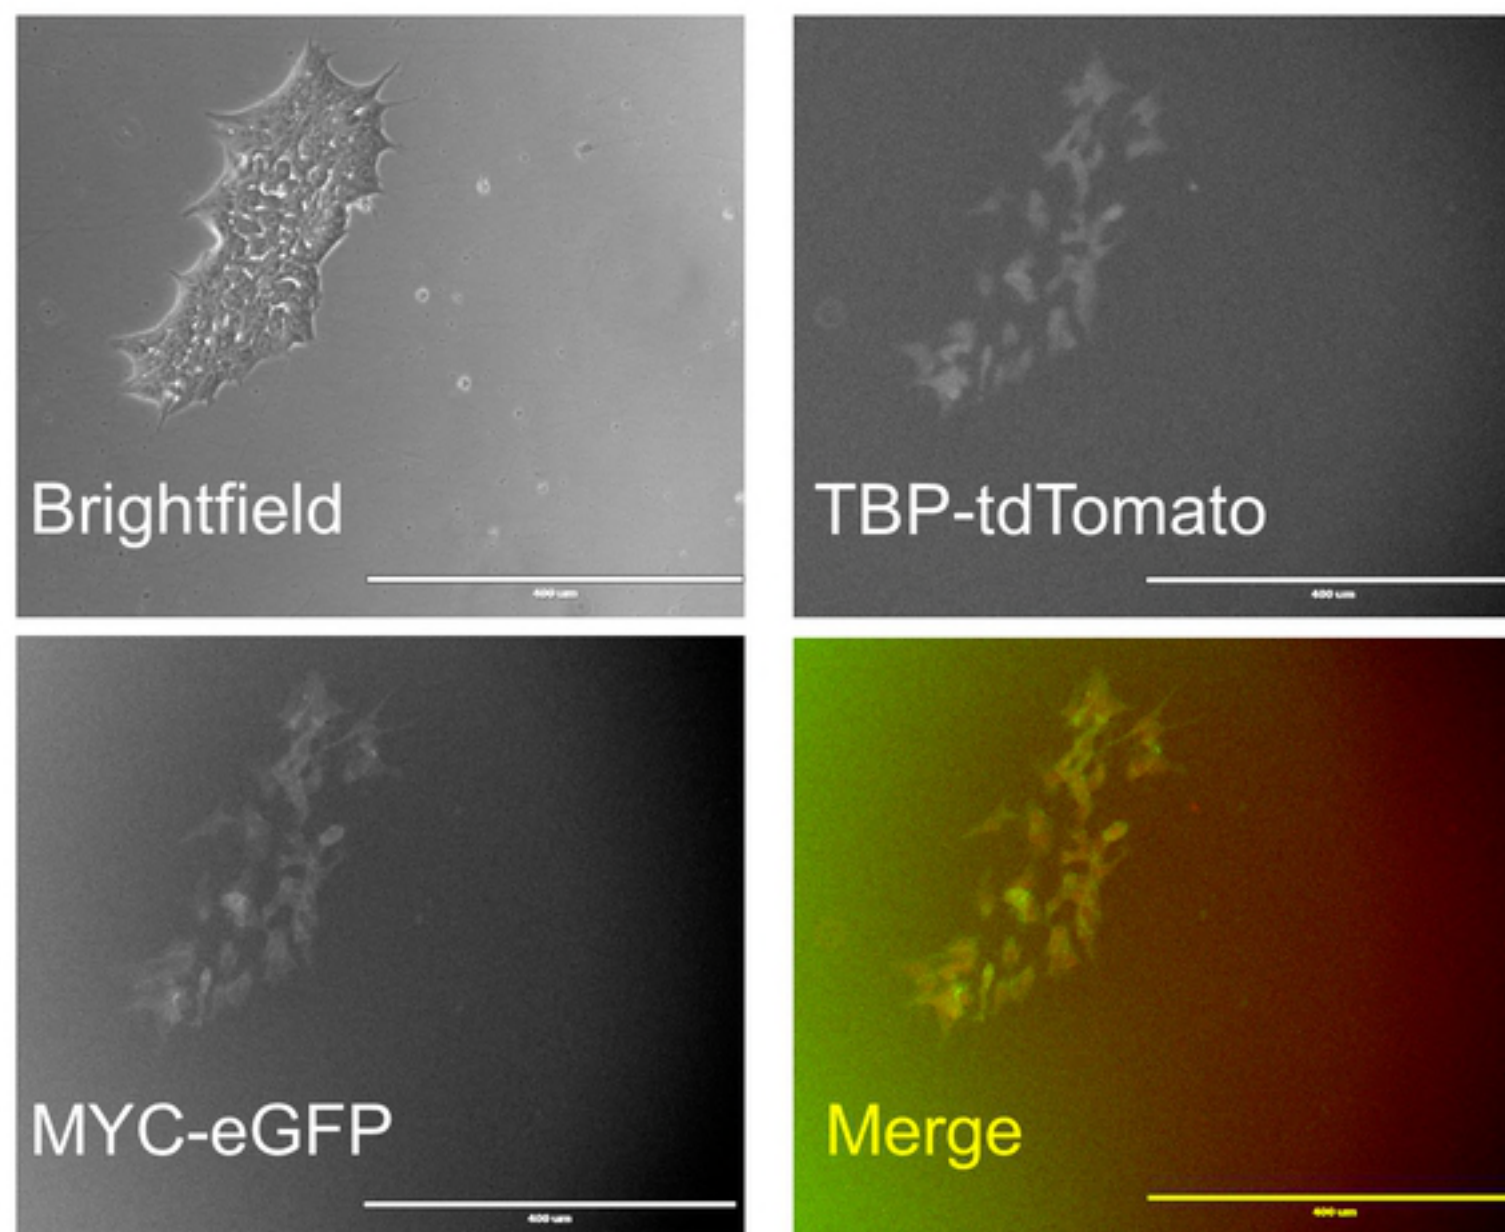

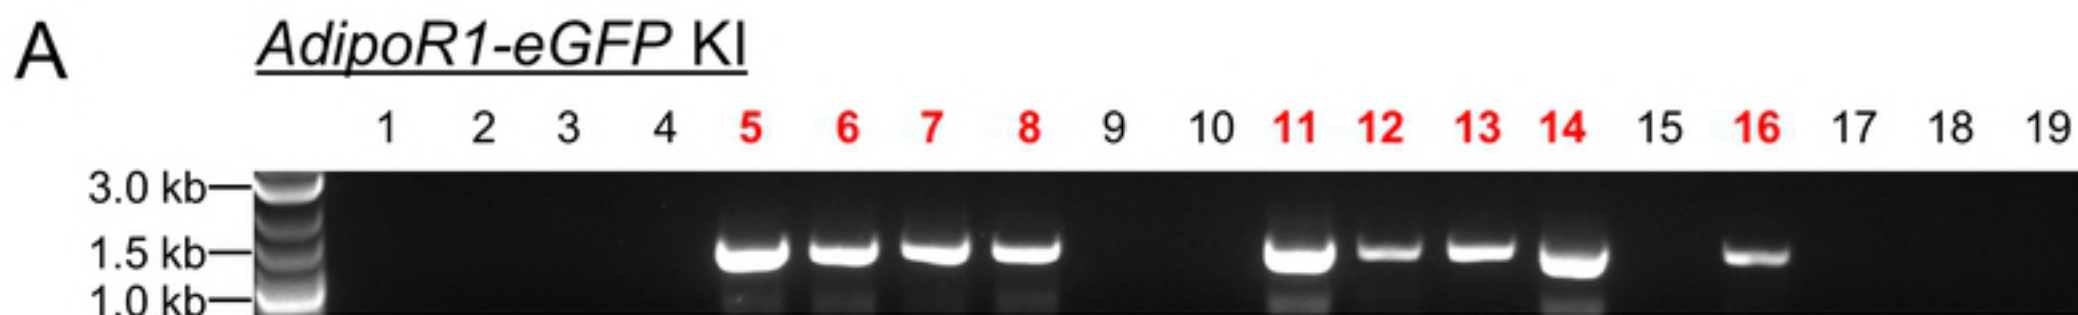

PCR: KI test

KI product = 1.2 kb

WT product = not possible

KI efficiency: 11/24 = 45.8%

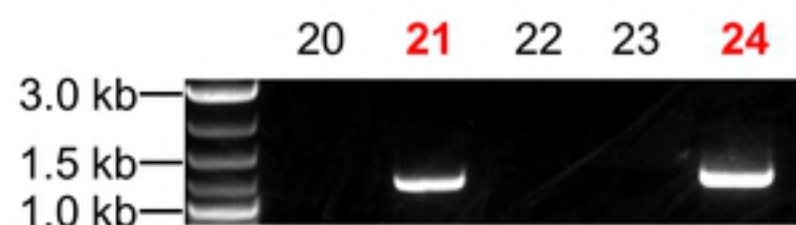

**B** *Mitf-eGFP KI*

bioRxiv preprint doi: <https://doi.org/10.1101/374728>; this version posted July 23, 2018. The copyright holder for this preprint (which was not certified by peer review) is the author/funder, who has granted bioRxiv a license to display the preprint in perpetuity. It is made available under aCC-BY 4.0 International license.

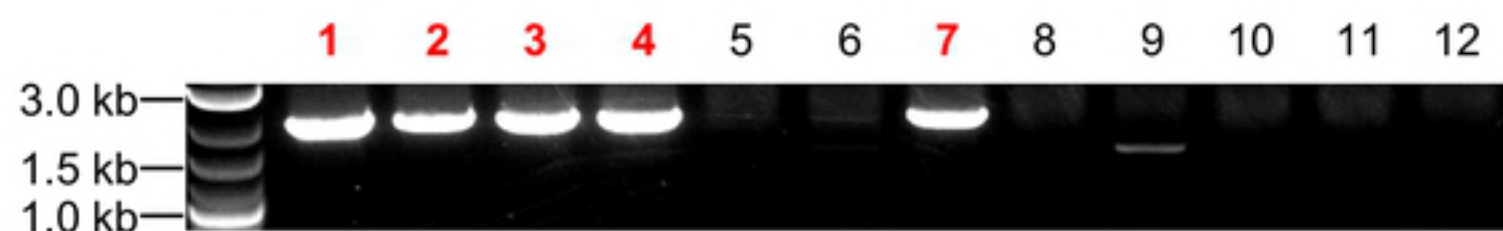

PCR: KI test

KI product = 2 kb

WT product = not possible

KI efficiency: 8/24 = 33.3%

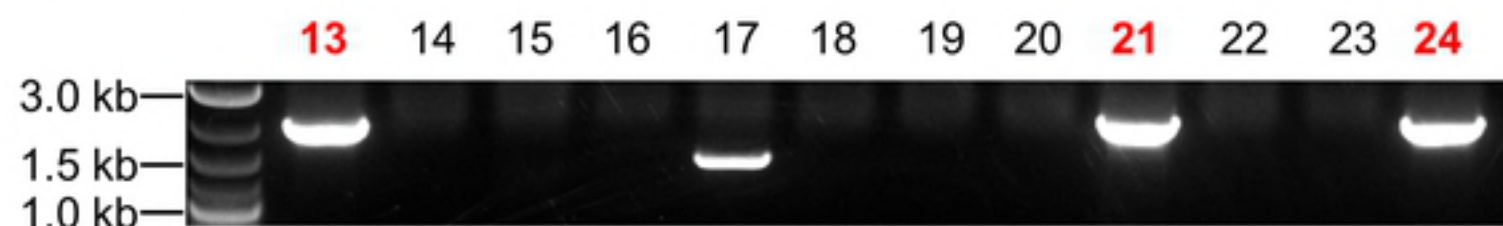

**C** *Six6-eGFP KI*

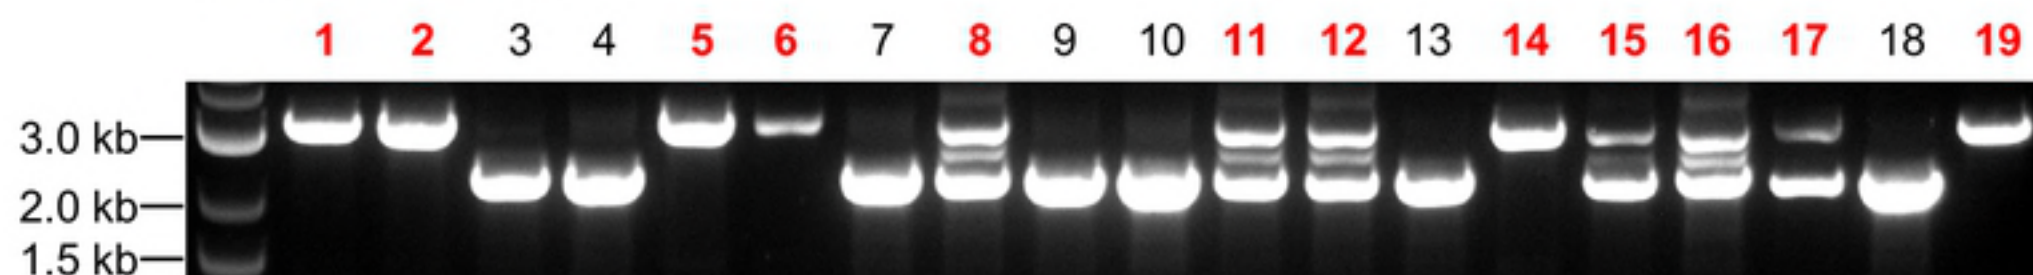

PCR: Zygoty/KI test

KI product = 3.1 kb

WT product = 2.3 kb

KI efficiency: 14/24 = 58.3%

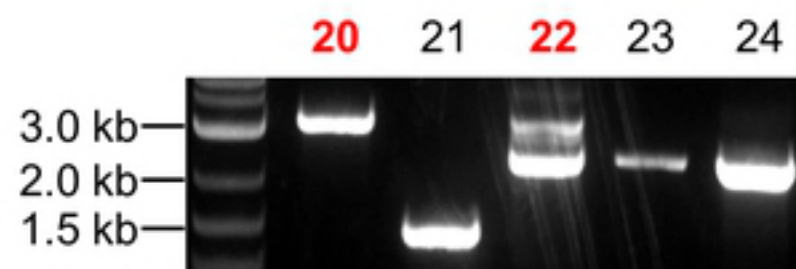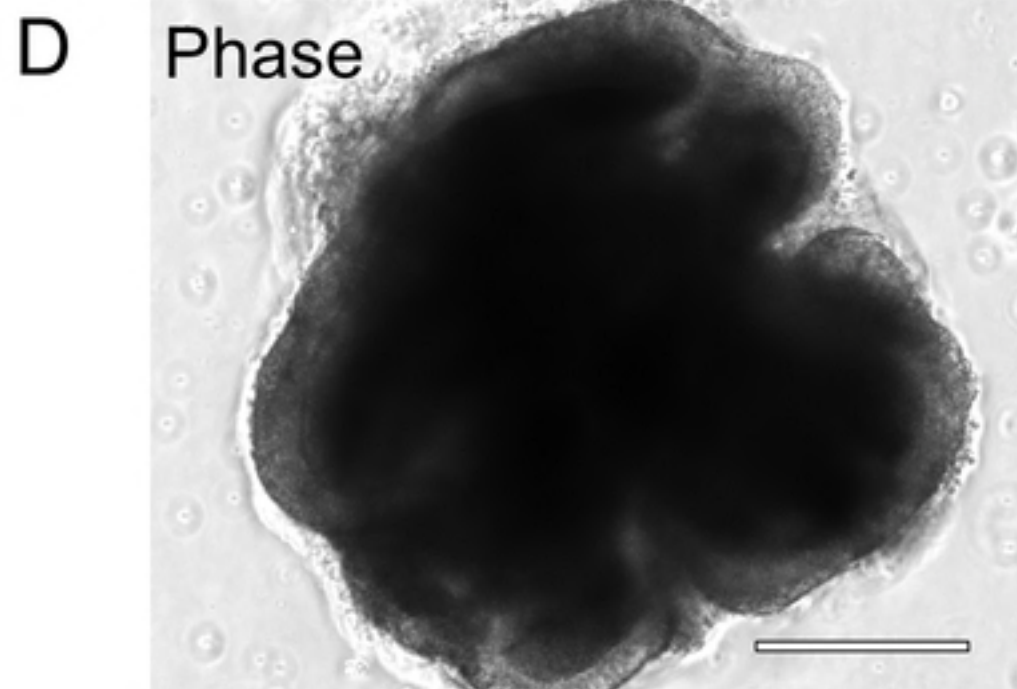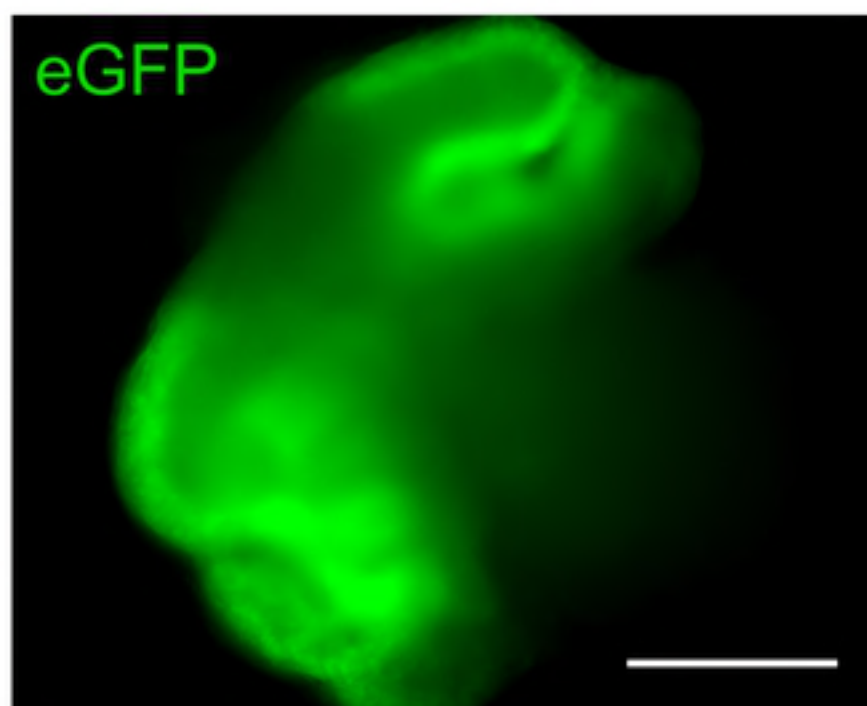

A

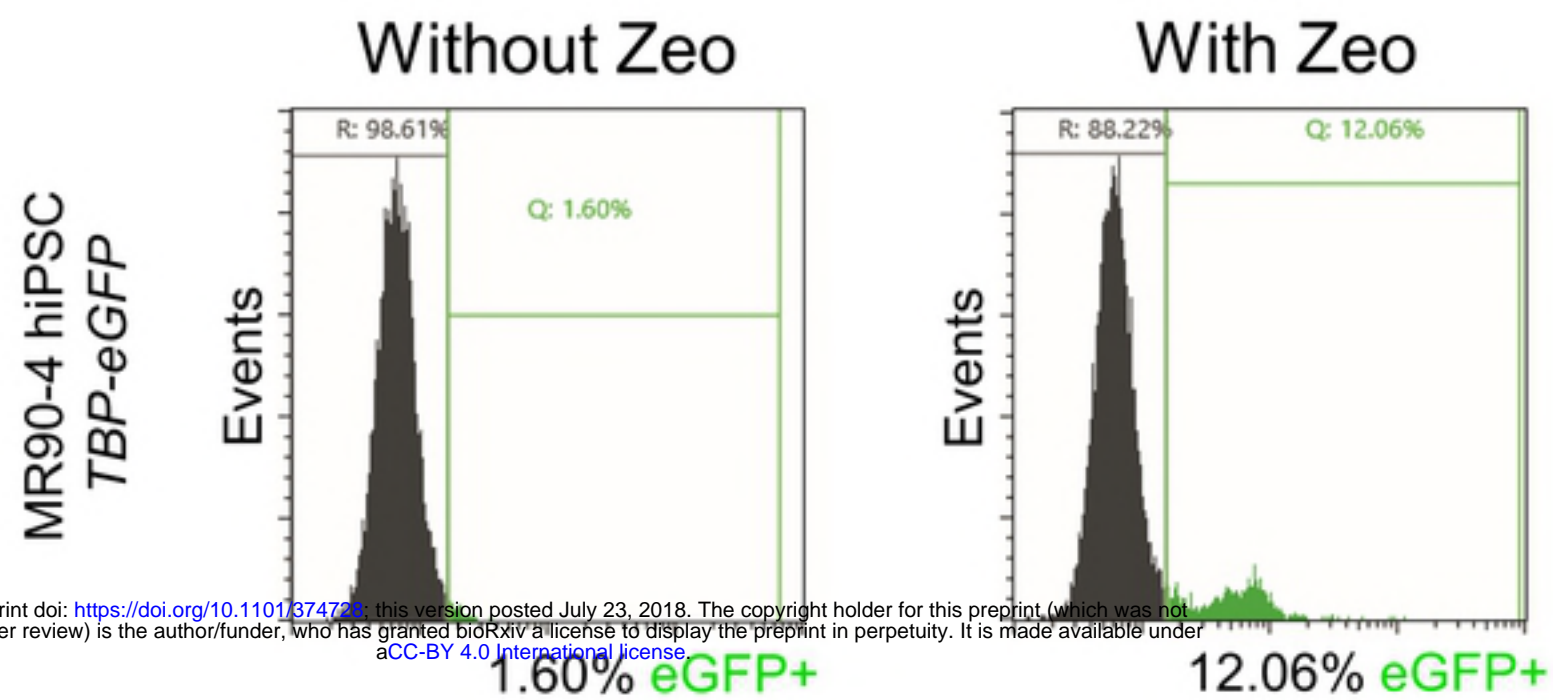

bioRxiv preprint doi: <https://doi.org/10.1101/374720>; this version posted July 23, 2018. The copyright holder for this preprint (which was not certified by peer review) is the author/funder, who has granted bioRxiv a license to display the preprint in perpetuity. It is made available under aCC-BY 4.0 International license.

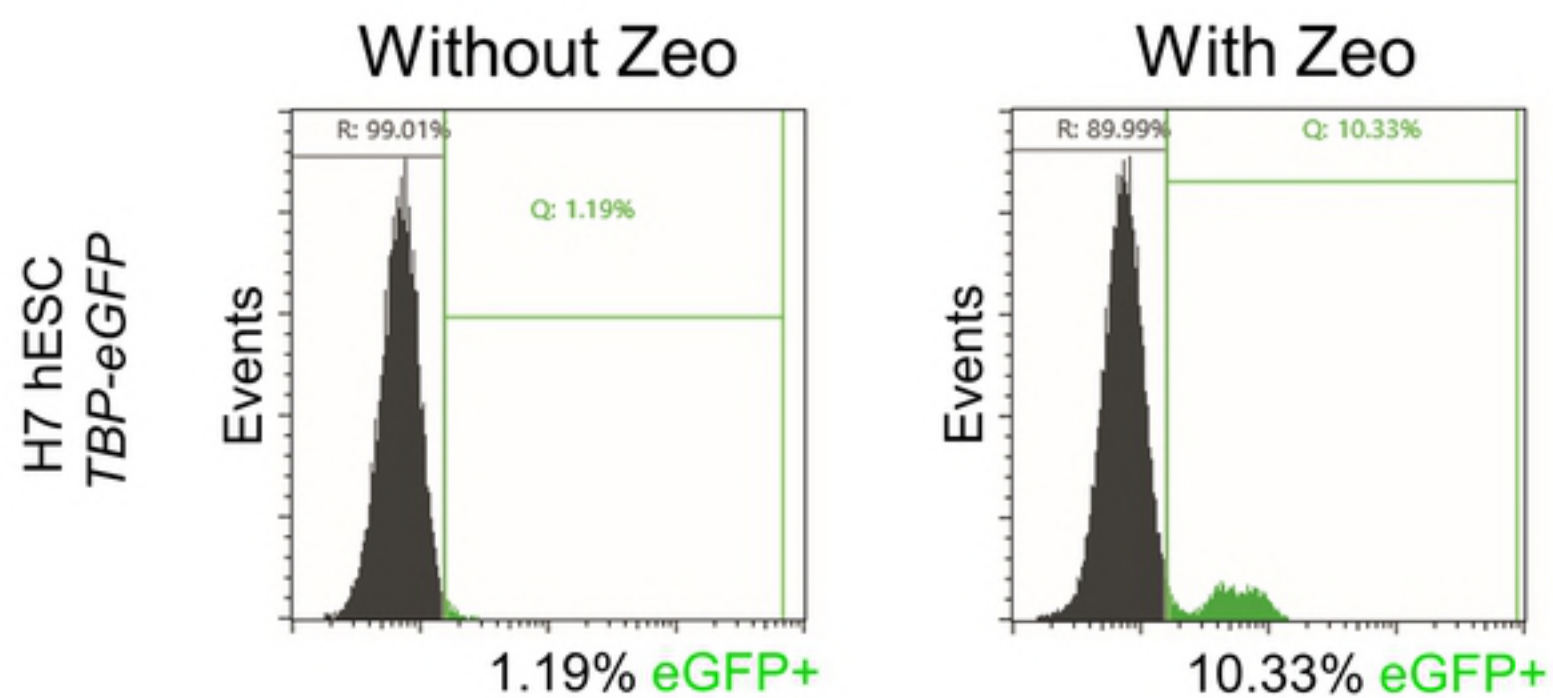

B

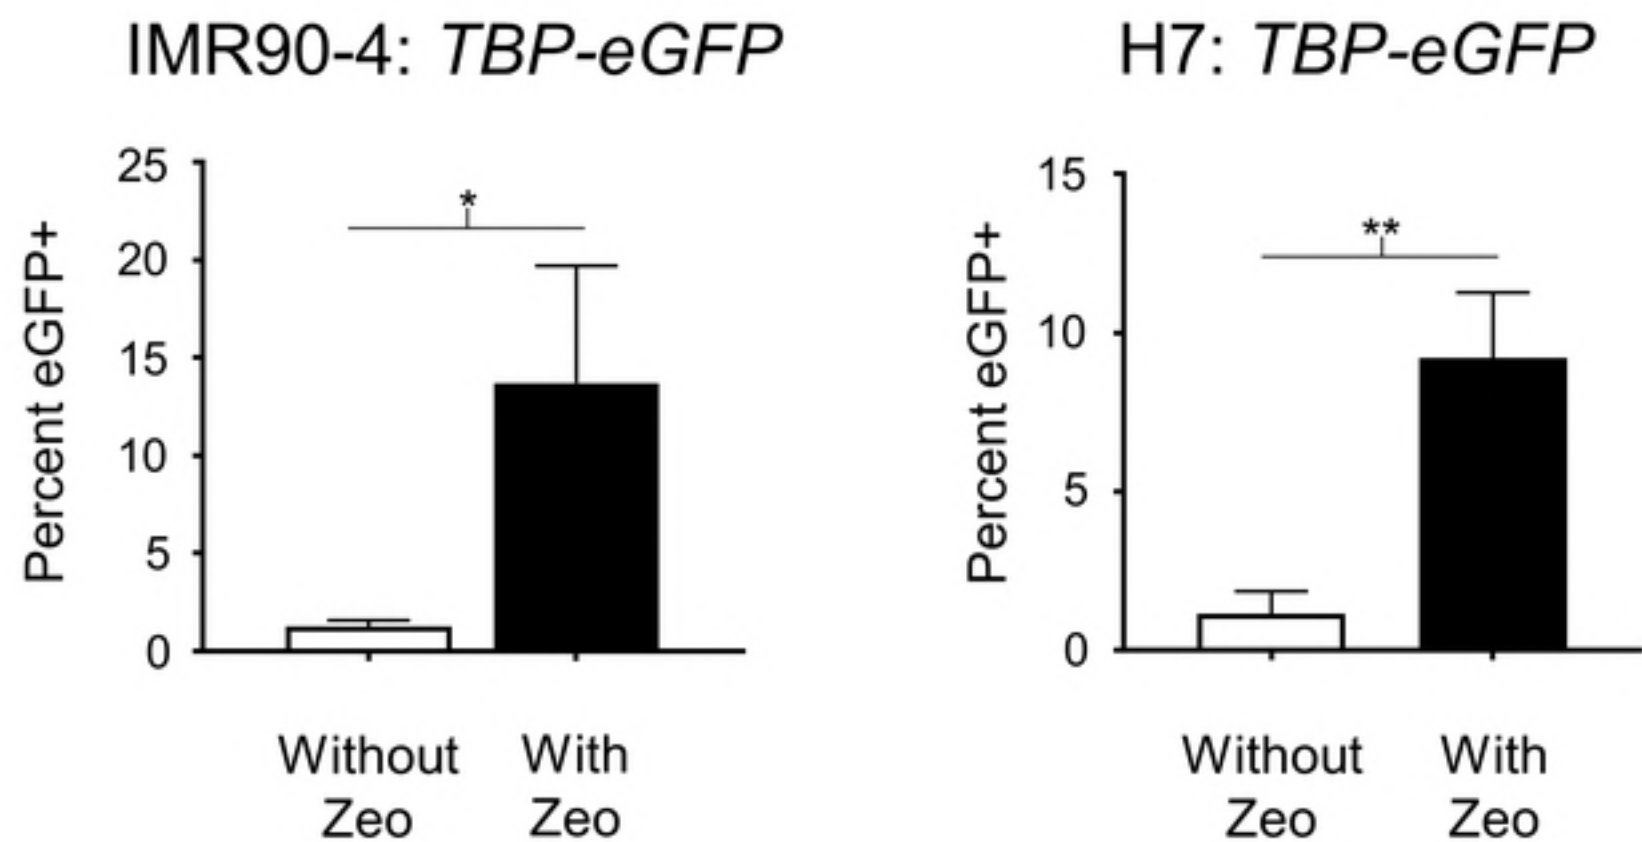

Source: https://www.biorxiv.org/content/early/2018/07/23/374728.full.pdf
